# Supplementary material
Source: publisher figshare collection journal article supplement (https://acs.figshare.com/ndownloader/files/5489864)

## **Supporting Information**

### **Optically Pure Diphenoxy Derivatives as More Flexible Probes for $\beta$ -Amyloid Plaques**

Jianhua Jia<sup>a</sup>, Jia Song<sup>a</sup>, Jiapei Dai<sup>b</sup>, Boli Liu<sup>a</sup>, Mengchao Cui<sup>a,\*</sup>

<sup>a</sup> Key Laboratory of Radiopharmaceuticals, Ministry of Education, College of Chemistry, Beijing Normal University, Beijing 100875, P. R. China.

<sup>b</sup> Wuhan Institute for Neuroscience and Neuroengineering, South-Central University for Nationalities, Wuhan 430074, P. R. China.

**Contents:**

1. HPLC chromatograms of key target compounds
2. Inhibition curves of key target compounds
3. Biodistribution in normal ICR mice of (*S*)-[<sup>125</sup>I]**5** and (*R*)-[<sup>125</sup>I]**5**
4. <sup>1</sup>H-NMR, <sup>13</sup>C-NMR and HRMS data of synthesized compounds

## 1. HPLC chromatograms of key target compounds

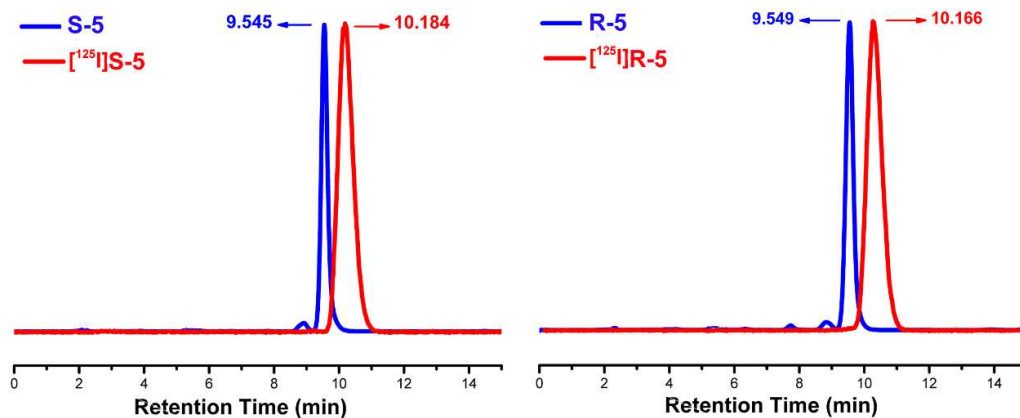

Figure S1 HPLC chromatograms of (*S*)-[<sup>125</sup>I]**5** and (*R*)-[<sup>125</sup>I]**5**.

Table S1 HPLC chromatograms data of (*S*)-[<sup>125</sup>I]**5** and (*R*)-[<sup>125</sup>I]**5**.

| Compd                                     | Flow rate<br>(mL/min) | Mobile phase<br>ACN % | Agela Technologies,<br>5 $\mu$ m | Retention time<br>(RT, min) | Purity<br>(%) |
|-------------------------------------------|-----------------------|-----------------------|----------------------------------|-----------------------------|---------------|
| <b>S-5</b>                                | 1                     | 70                    | 4.6 $\times$ 250 mm              | 9.545                       | 96.543        |
| ( <i>S</i> )-[ <sup>125</sup> I] <b>5</b> | 1                     | 70                    | 4.6 $\times$ 250 mm              | 10.184                      | 99.936        |
| <b>R-5</b>                                | 1                     | 70                    | 4.6 $\times$ 250 mm              | 9.549                       | 96.319        |
| ( <i>R</i> )-[ <sup>125</sup> I] <b>5</b> | 1                     | 70                    | 4.6 $\times$ 250 mm              | 10.166                      | 98.986        |

## 2. Inhibition curves of key target compounds

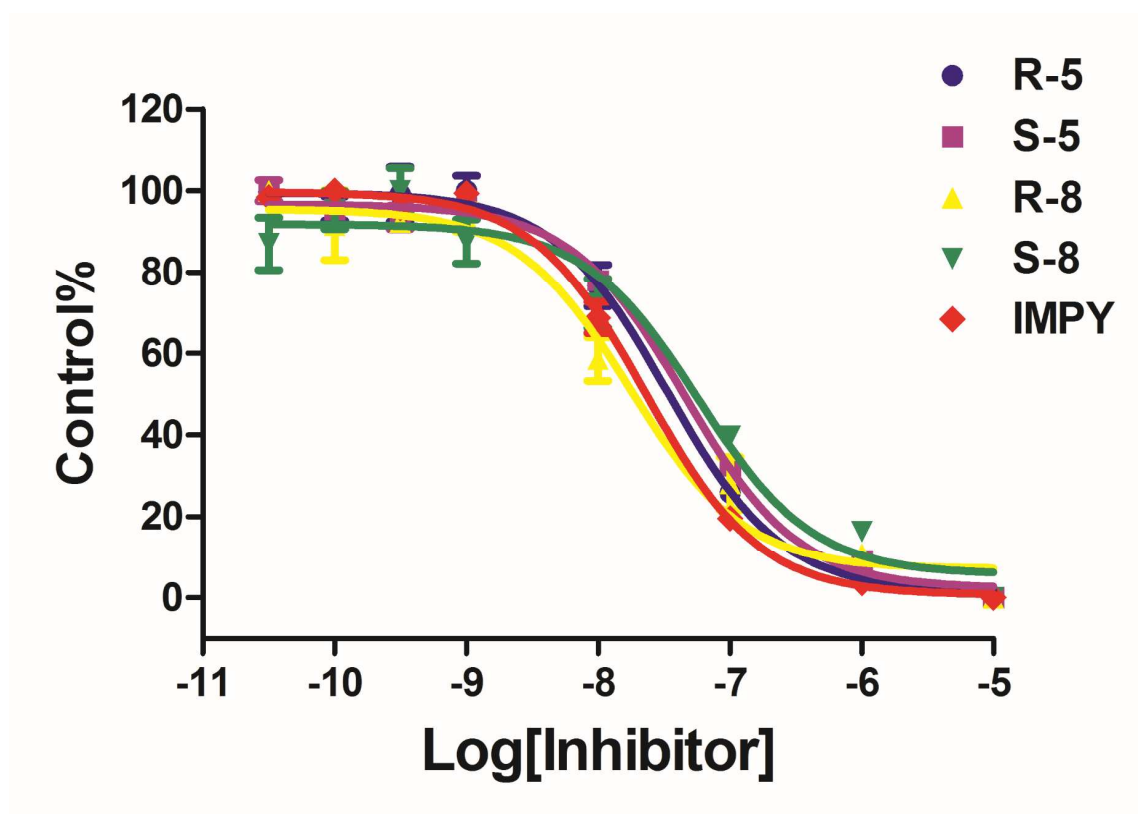

Figure S2. Inhibition curves of optically pure diphenoxy derivatives and **IMPY** for the binding of [ $^{125}$ I]IMPY to A $\beta_{1-42}$  aggregates.

### 3. Biodistribution in normal ICR mice of (*S*)-[ $^{125}$ I]**5** and (*R*)-[ $^{125}$ I]**5**

Table S2 Biodistribution in normal mice (ICR, 5 weeks, 22 – 25 g, male) after i.v. injection of (*S*)-[ $^{125}$ I]**5** and (*R*)-[ $^{125}$ I]**5**.<sup>a</sup>

| Organ                                                           | 2 min        | 10 min       | 30 min       | 60 min      |
|-----------------------------------------------------------------|--------------|--------------|--------------|-------------|
| <i>(S)</i> -[ $^{125}$ I] <b>5</b> (Log <i>D</i> = 3.26 ± 0.12) |              |              |              |             |
| Blood                                                           | 10.86 ± 4.31 | 12.36 ± 4.40 | 10.95 ± 2.79 | 4.83 ± 1.71 |
| Brain                                                           | 4.37 ± 0.70  | 2.44 ± 0.46  | 0.80 ± 0.18  | 0.23 ± 0.04 |
| Heart                                                           | 6.47 ± 0.28  | 4.25 ± 1.18  | 1.77 ± 0.43  | 0.71 ± 0.18 |
| Liver                                                           | 21.96 ± 5.77 | 19.90 ± 1.47 | 6.21 ± 2.73  | 2.47 ± 1.20 |
| Spleen                                                          | 6.82 ± 1.86  | 5.01 ± 1.39  | 2.02 ± 0.67  | 0.62 ± 0.17 |

|                                                       |              |              |               |              |
|-------------------------------------------------------|--------------|--------------|---------------|--------------|
| Lung                                                  | 10.28 ± 5.90 | 6.20 ± 1.94  | 2.71 ± 0.89   | 1.91 ± 1.10  |
| Kidney                                                | 11.41 ± 1.28 | 28.22 ± 1.36 | 11.22 ± 5.01  | 9.55 ± 4.32  |
| Pancreas                                              | 11.86 ± 2.66 | 4.95 ± 0.25  | 1.99 ± 0.33   | 1.02 ± 0.41  |
| Muscle                                                | 7.27 ± 2.54  | 3.37 ± 0.54  | 1.82 ± 0.91   | 0.57 ± 0.24  |
| Intestine <sup>b</sup>                                | 6.23 ± 1.79  | 13.54 ± 4.56 | 34.88 ± 2.10  | 36.70 ± 8.94 |
| Stomach <sup>b</sup>                                  | 0.16 ± 0.02  | 0.25 ± 0.10  | 0.13 ± 0.02   | 0.16 ± 0.02  |
| Thyroid <sup>b</sup>                                  | 1.05 ± 0.25  | 2.18 ± 1.19  | 2.46 ± 1.05   | 2.72 ± 1.58  |
| (R)-[ <sup>125</sup> I]5 (Log <i>D</i> = 2.97 ± 0.04) |              |              |               |              |
| Blood                                                 | 9.34 ± 2.01  | 7.08 ± 1.91  | 6.15 ± 3.44   | 5.60 ± 3.08  |
| Brain                                                 | 3.72 ± 0.31  | 1.81 ± 0.30  | 0.50 ± 0.14   | 0.21 ± 0.12  |
| Heart                                                 | 6.87 ± 0.64  | 3.13 ± 0.83  | 1.41 ± 0.57   | 0.69 ± 0.32  |
| Liver                                                 | 22.65 ± 2.37 | 16.39 ± 2.47 | 5.69 ± 1.69   | 2.23 ± 1.52  |
| Spleen                                                | 4.79 ± 1.81  | 3.43 ± 2.67  | 0.97 ± 0.38   | 0.62 ± 0.16  |
| Lung                                                  | 6.73 ± 0.52  | 4.45 ± 1.24  | 2.52 ± 1.32   | 1.14 ± 0.57  |
| Kidney                                                | 11.16 ± 0.85 | 17.87 ± 7.67 | 10.75 ± 1.55  | 3.19 ± 2.36  |
| Pancreas                                              | 8.43 ± 0.97  | 3.83 ± 0.91  | 1.21 ± 0.36   | 0.97 ± 0.69  |
| Muscle                                                | 4.83 ± 0.56  | 2.88 ± 0.90  | 1.04 ± 0.46   | 0.83 ± 0.68  |
| Intestine <sup>b</sup>                                | 5.32 ± 0.07  | 20.68 ± 7.96 | 40.28 ± 15.15 | 36.19 ± 8.43 |
| Stomach <sup>b</sup>                                  | 0.17 ± 0.04  | 0.10 ± 0.02  | 0.06 ± 0.01   | 0.07 ± 0.01  |
| Thyroid <sup>b</sup>                                  | 1.13 ± 0.27  | 1.42 ± 0.6   | 1.19 ± 0.74   | 0.87 ± 0.59  |

<sup>a</sup> Expressed as % injected dose per gram. Average for 5 mice ± standard deviation.

<sup>b</sup> Expressed as % injected dose per organ.

#### 4. <sup>1</sup>H-NMR, <sup>13</sup>C-NMR and HRMS data of synthesized compounds

$^1\text{H}$ -NMR for compound (*R*)-1

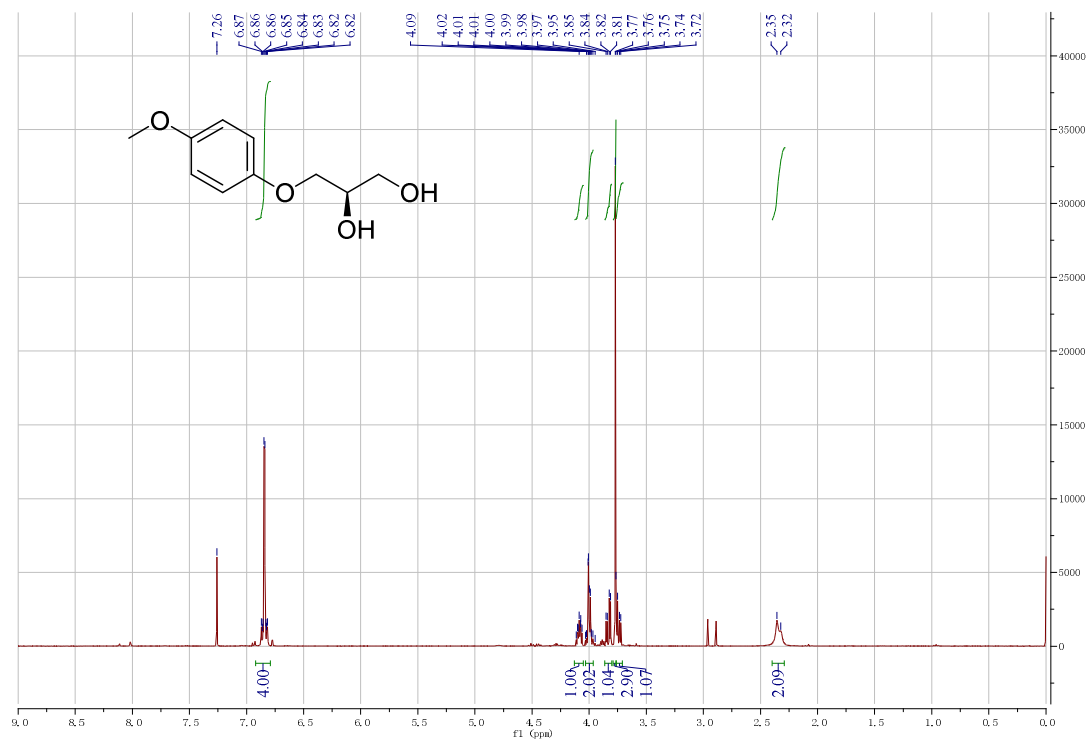

$^{13}\text{C}$ -NMR for compound (*R*)-1

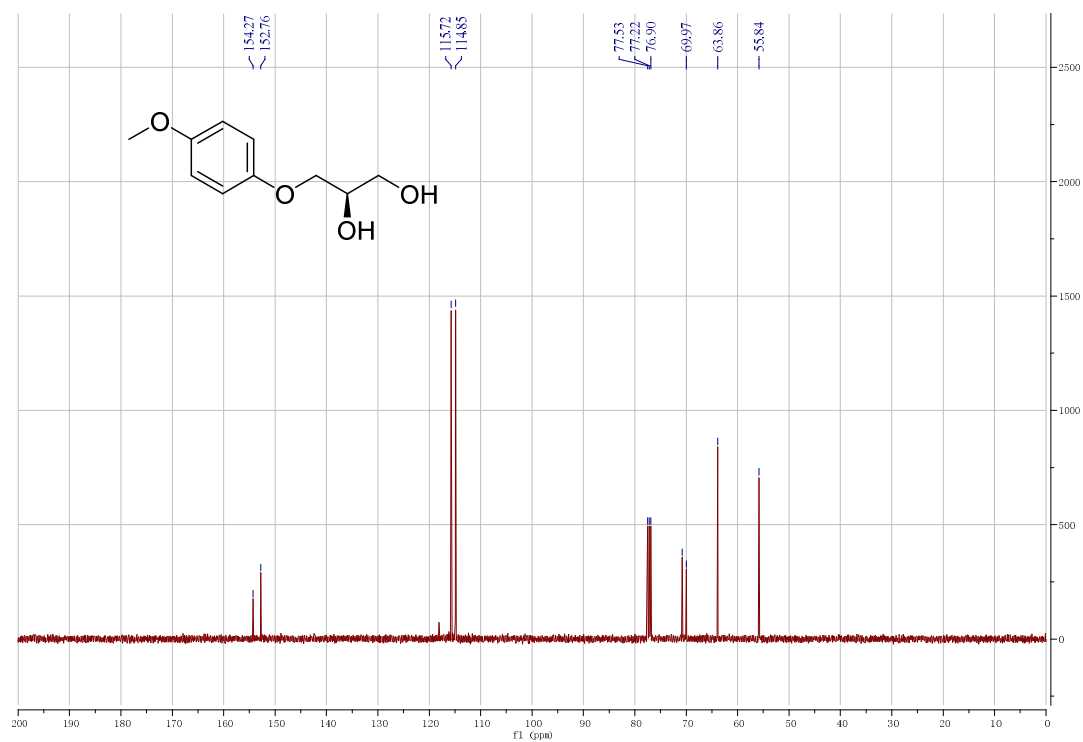

## HRMS for compound (*R*)-1

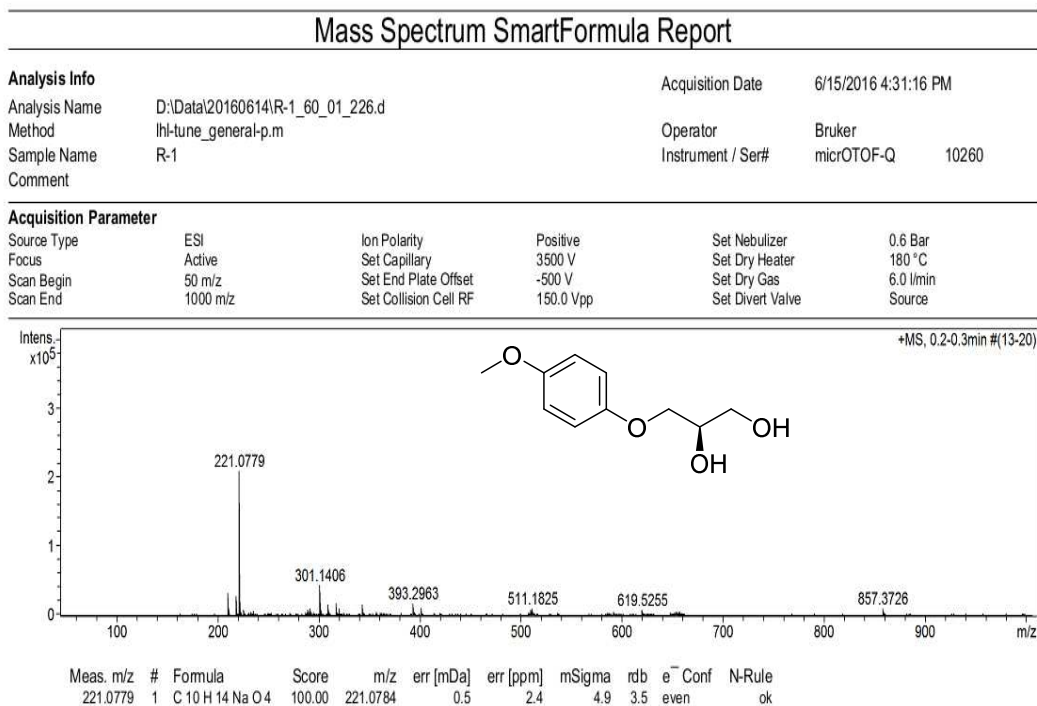

## <sup>1</sup>H-NMR for compound (*S*)-1

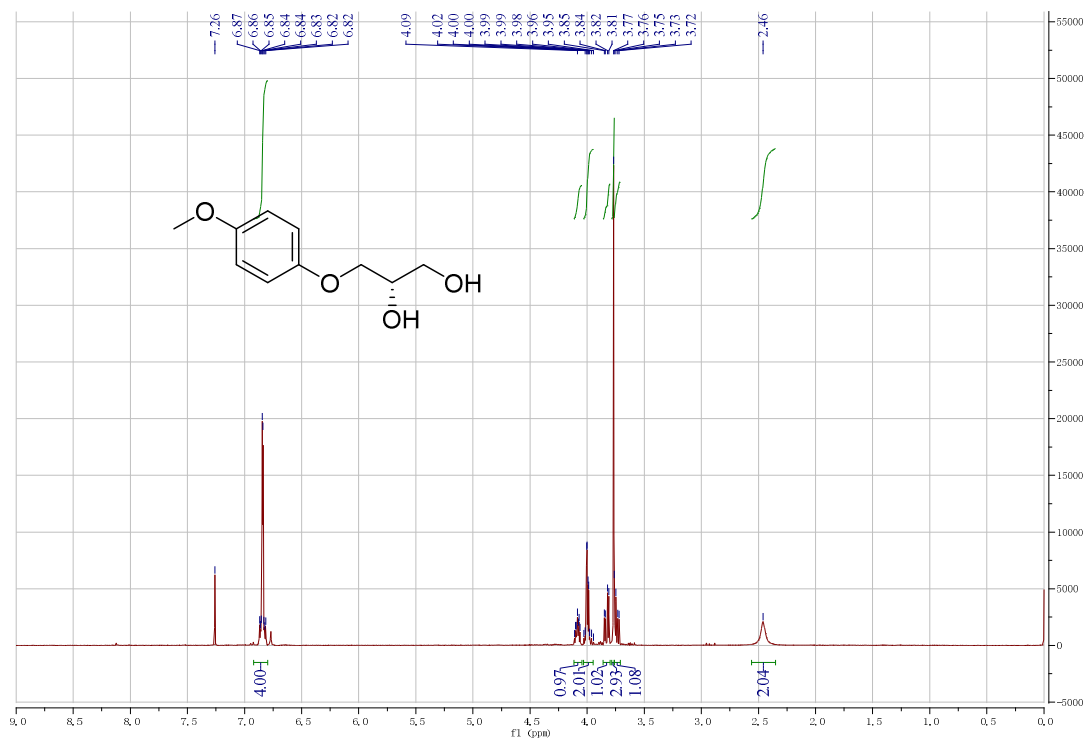

<sup>13</sup>C-NMR for compound (S)-1

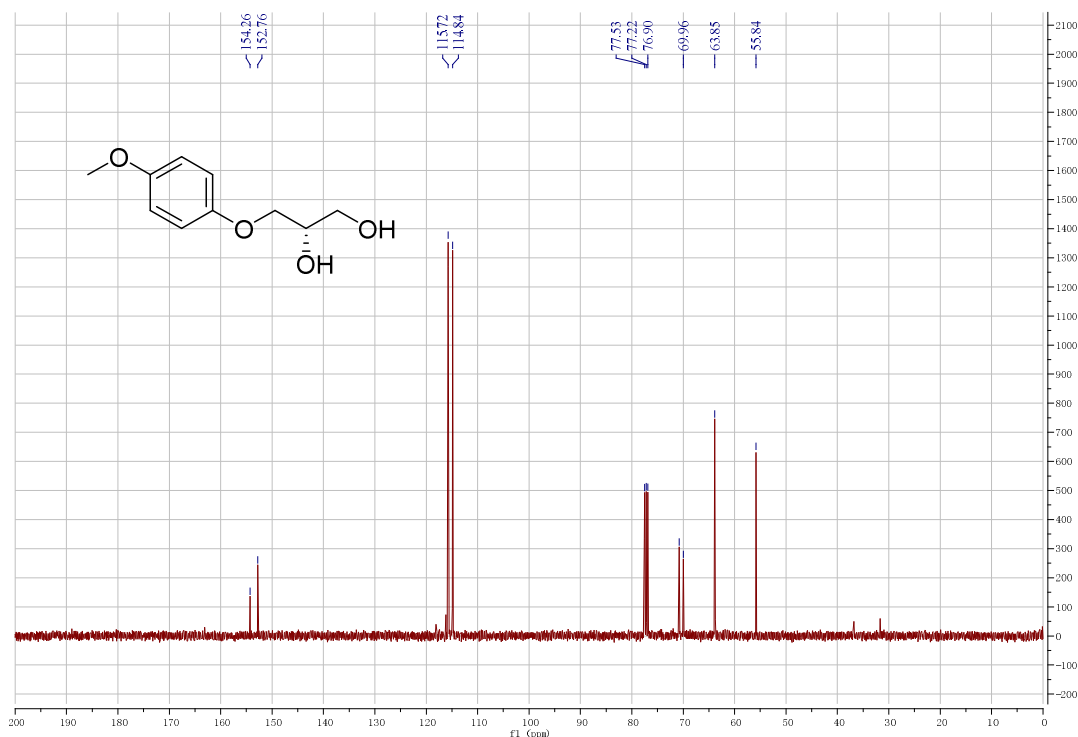

HRMS for compound (S)-1

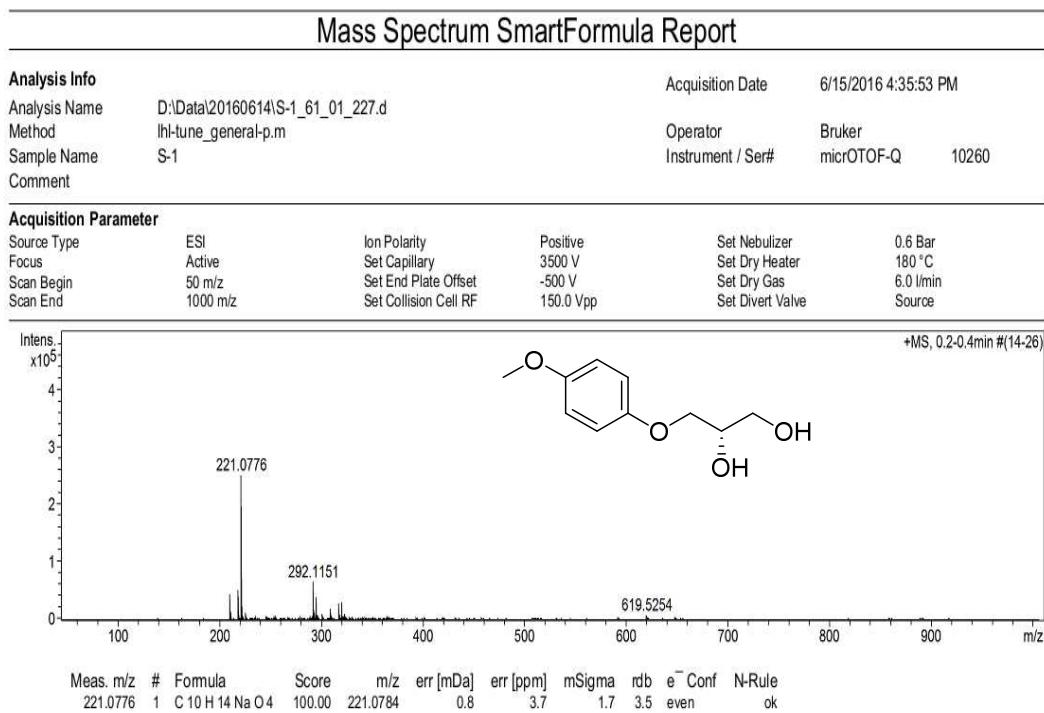



$^1\text{H}$ -NMR for compound (*R*)-2

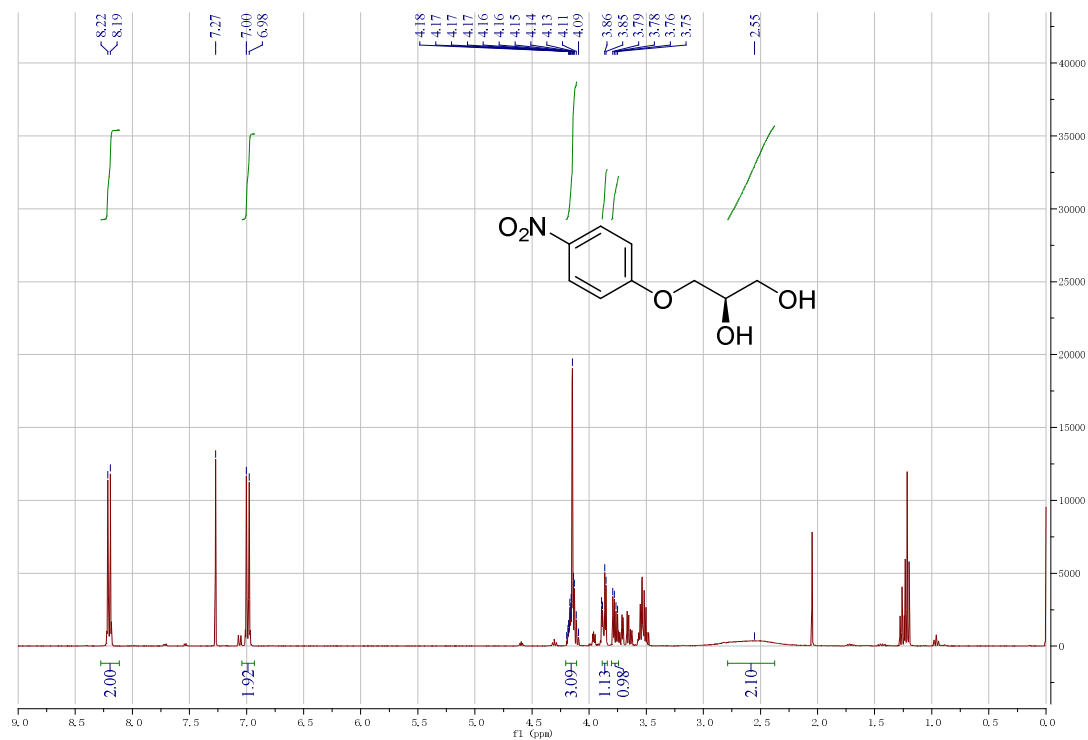

$^{13}\text{C}$ -NMR for compound (*R*)-2

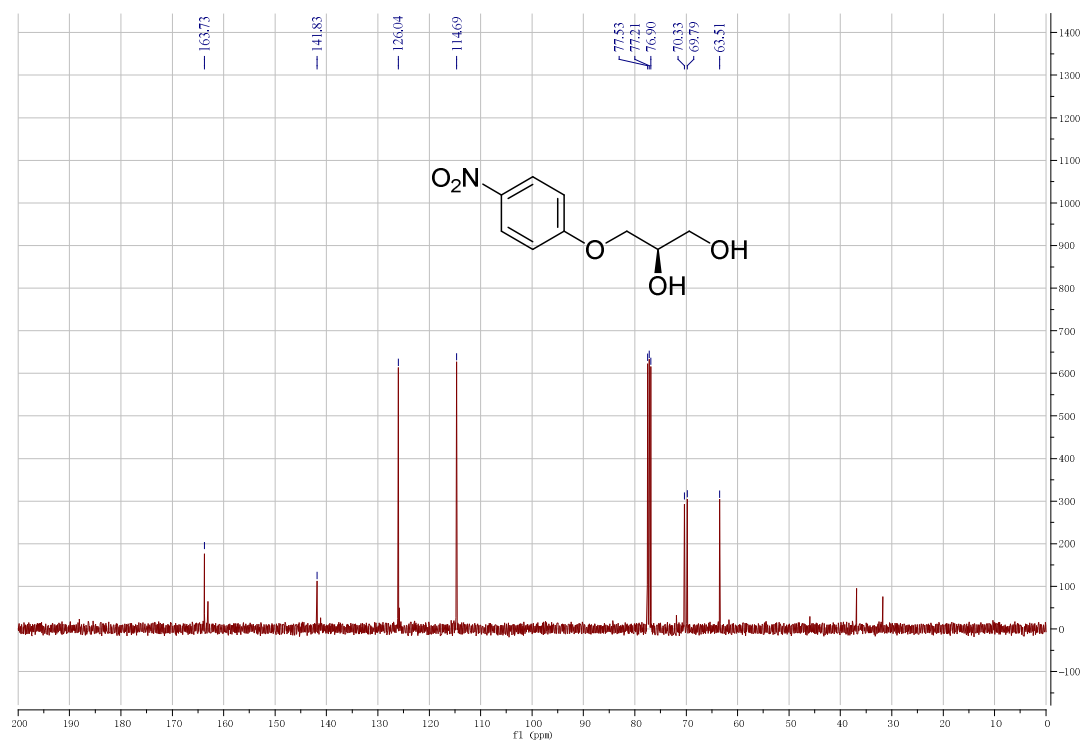

## HRMS for compound (*R*)-2

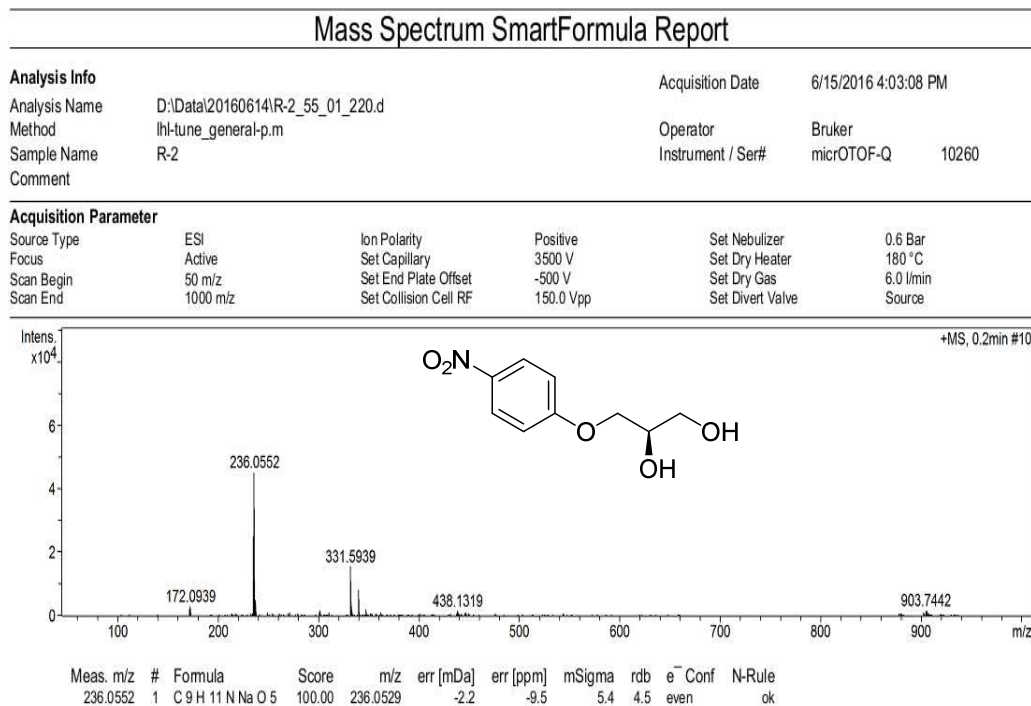

## <sup>1</sup>H-NMR for compound (*S*)-2

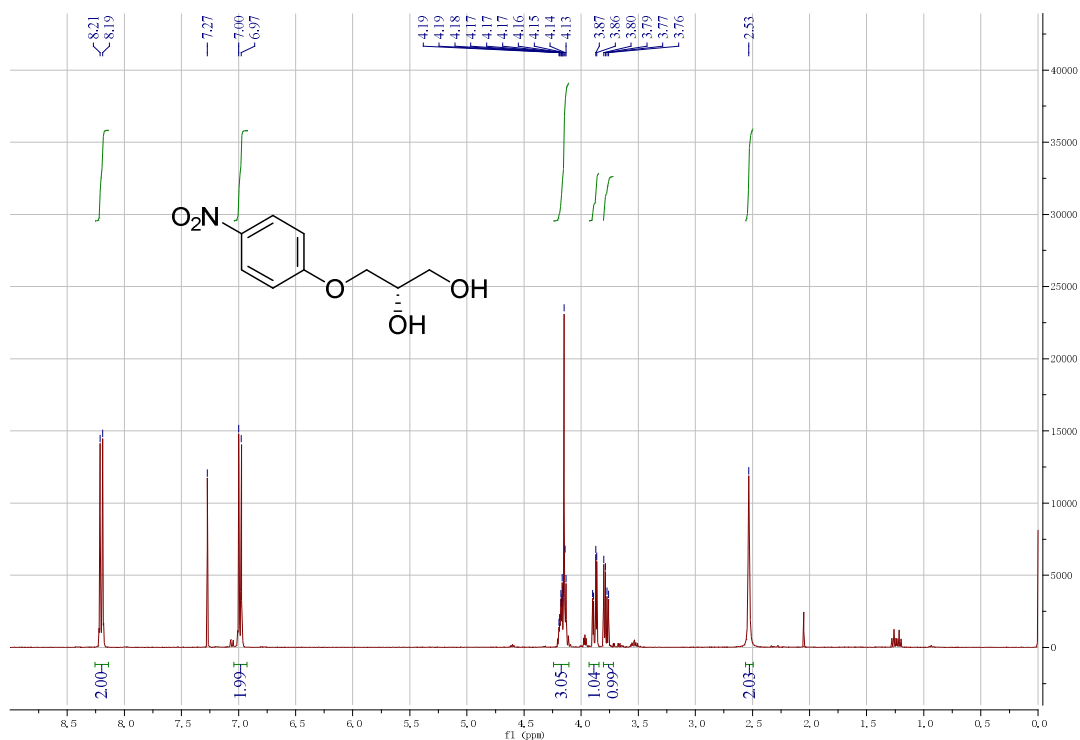

<sup>13</sup>C-NMR for compound (S)-2

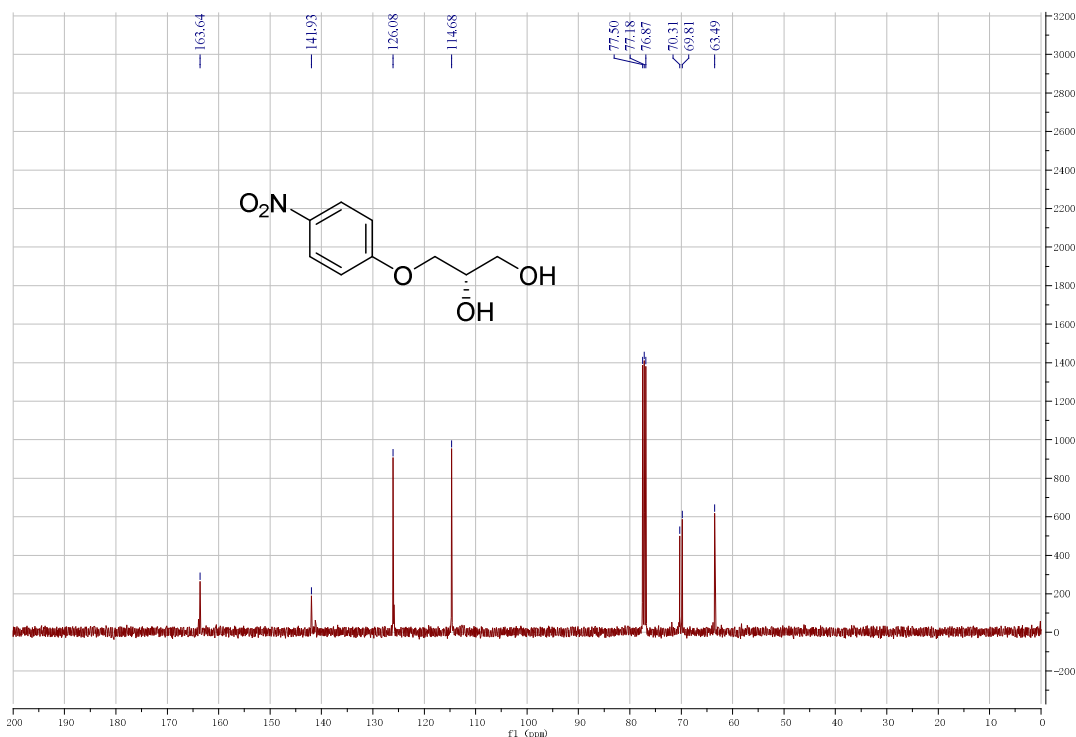

HRMS for compound (S)-2

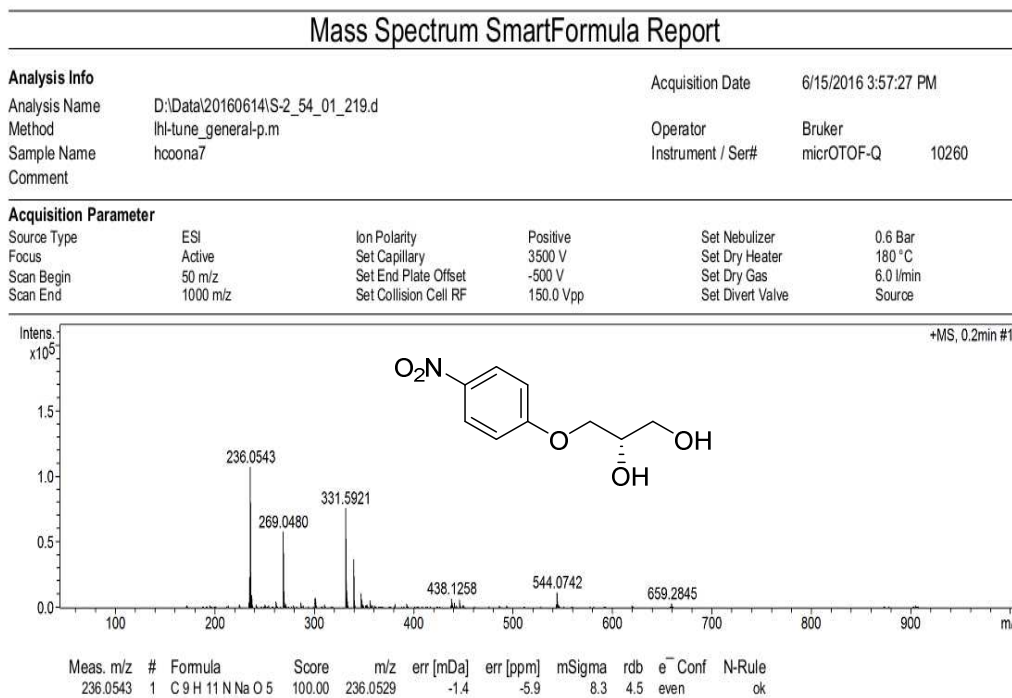

<sup>1</sup>H-NMR for compound (*S*)-3

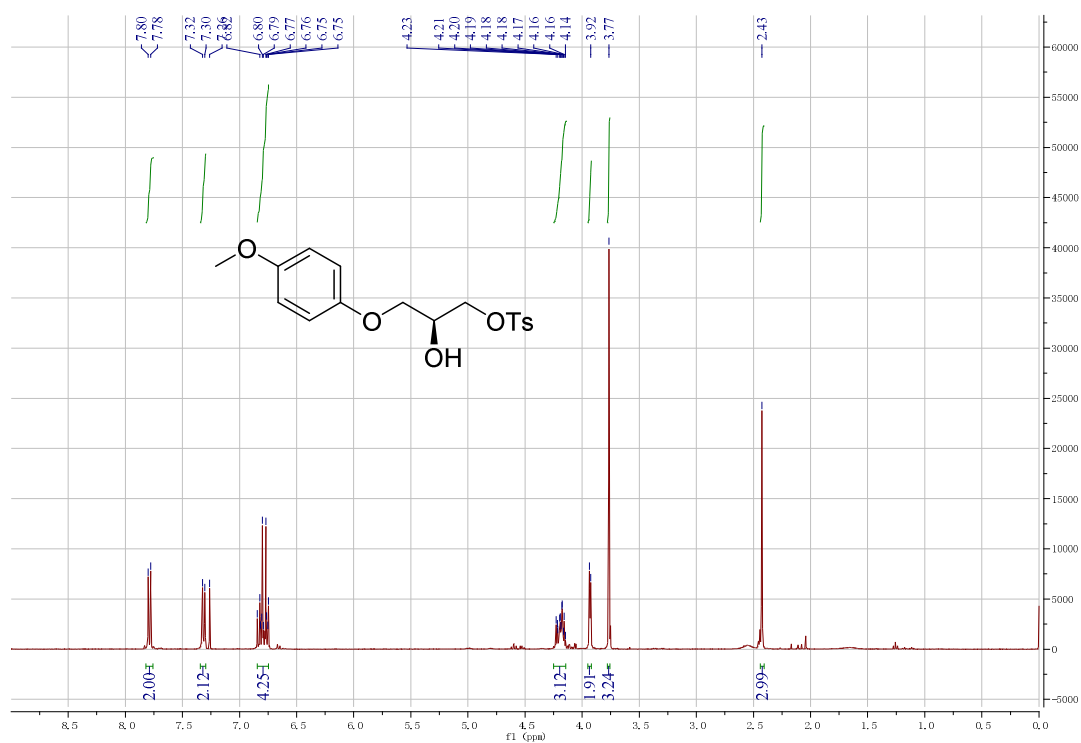

<sup>13</sup>C-NMR for compound (*S*)-3

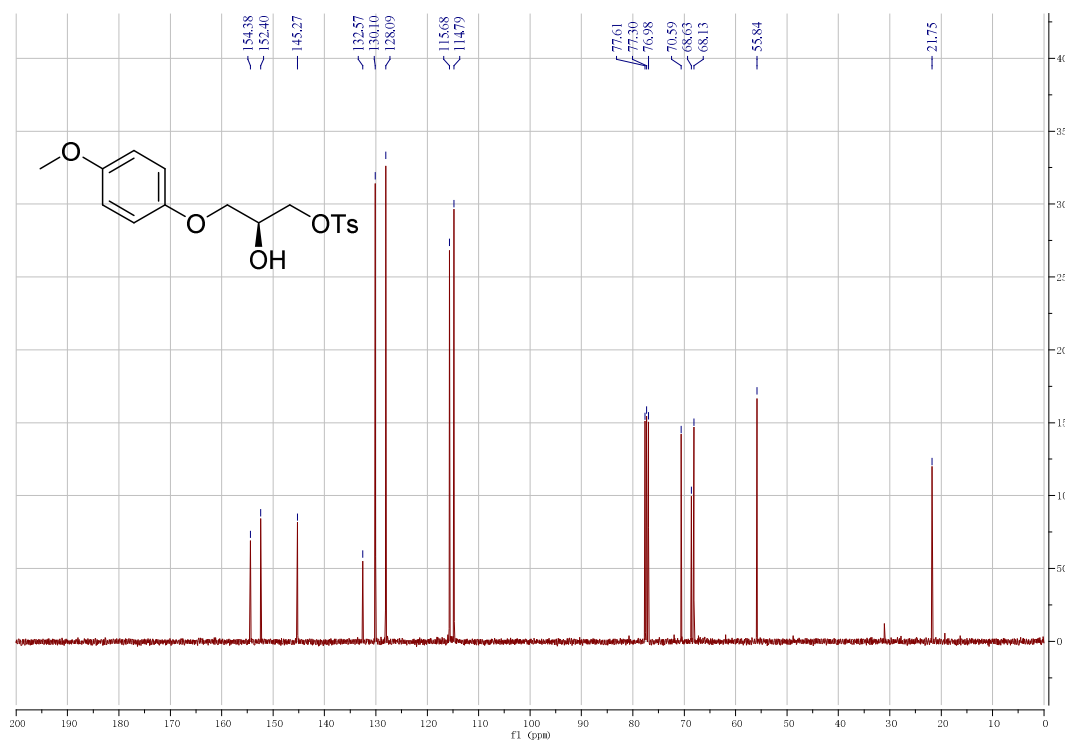

# HRMS for compound (*S*)-**3**

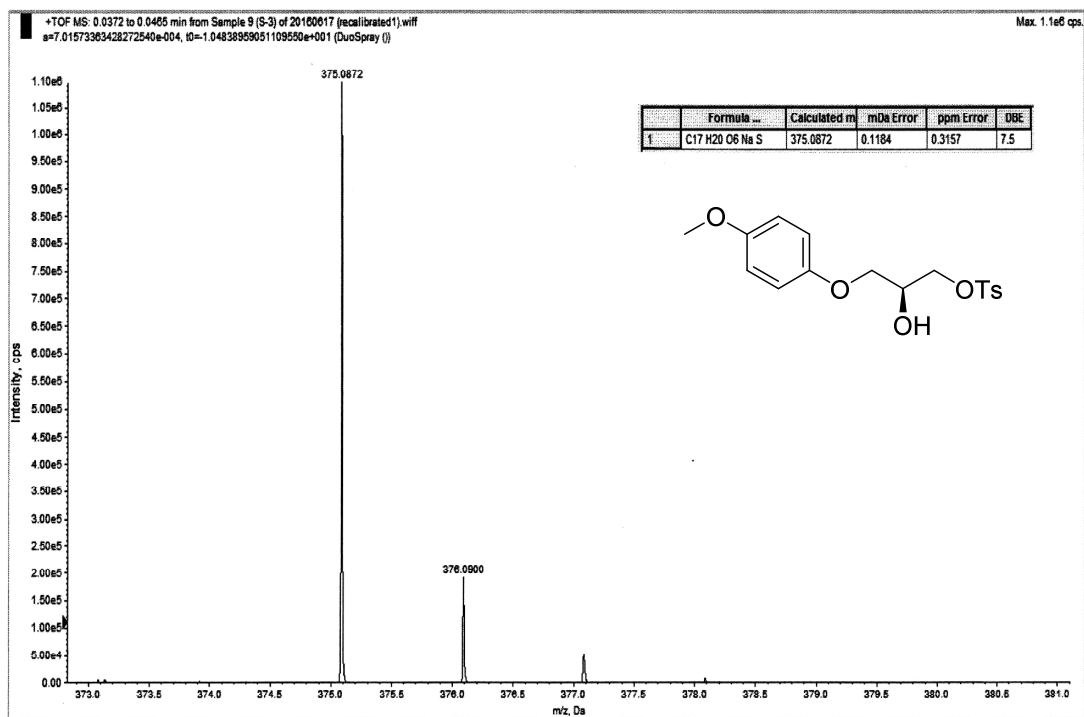

# <sup>1</sup>H-NMR for compound (*R*)-**3**

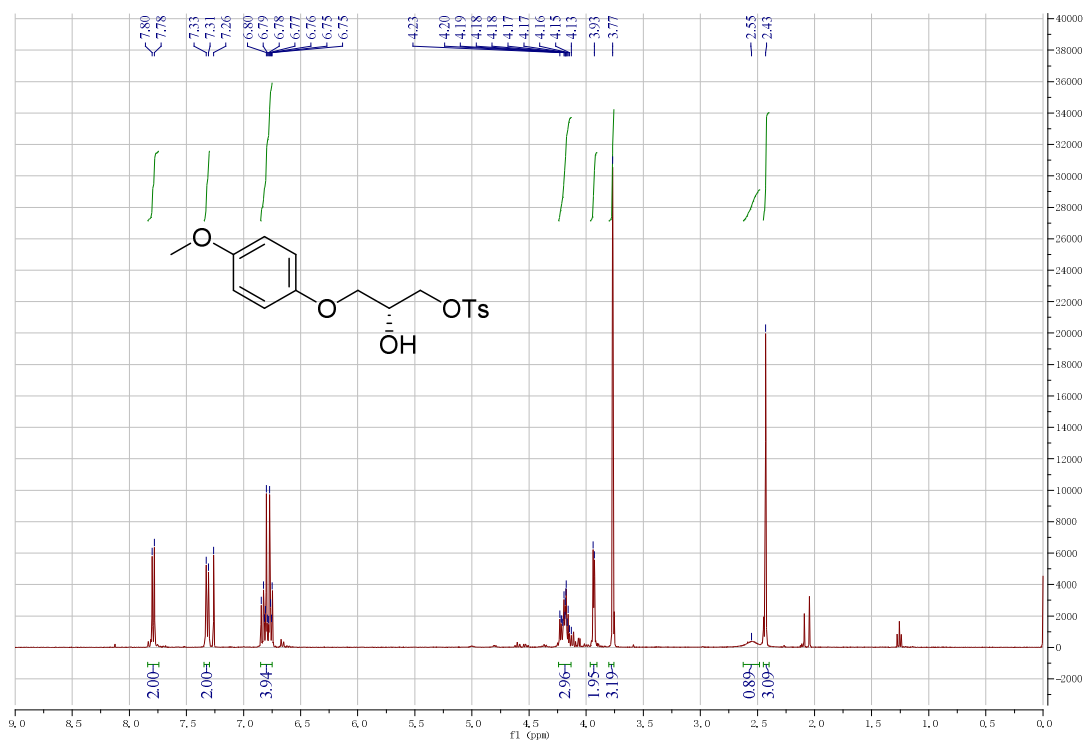

$^{13}\text{C}$ -NMR for compound (*R*)-3

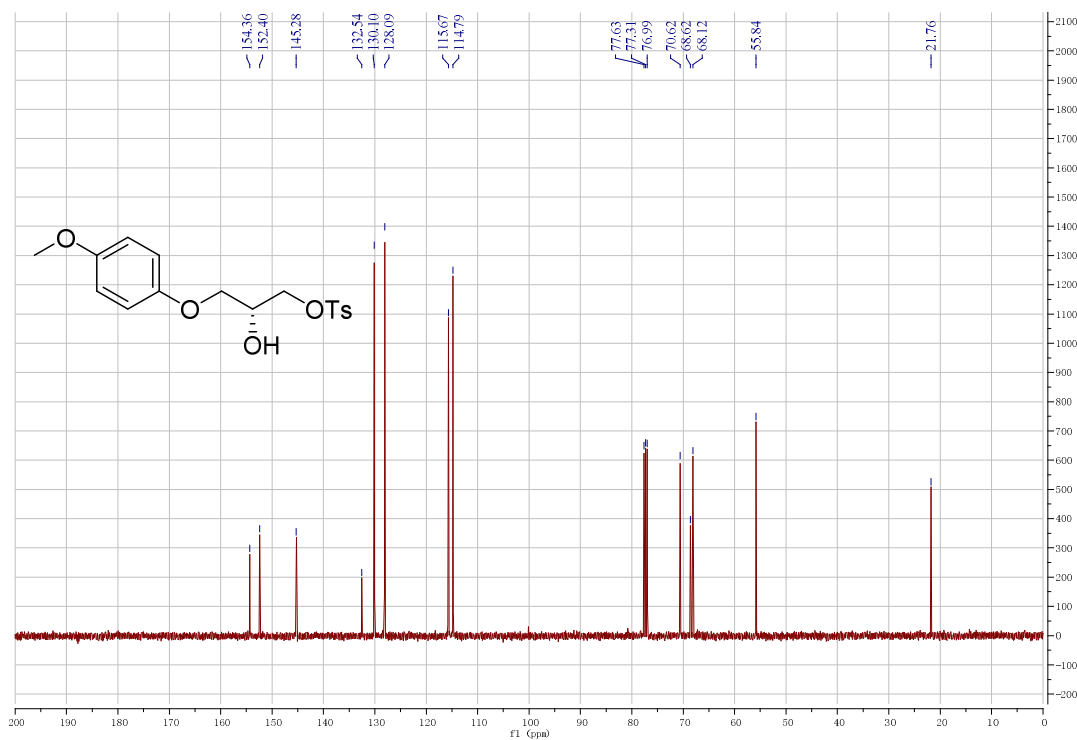

HRMS for compound (*R*)-3

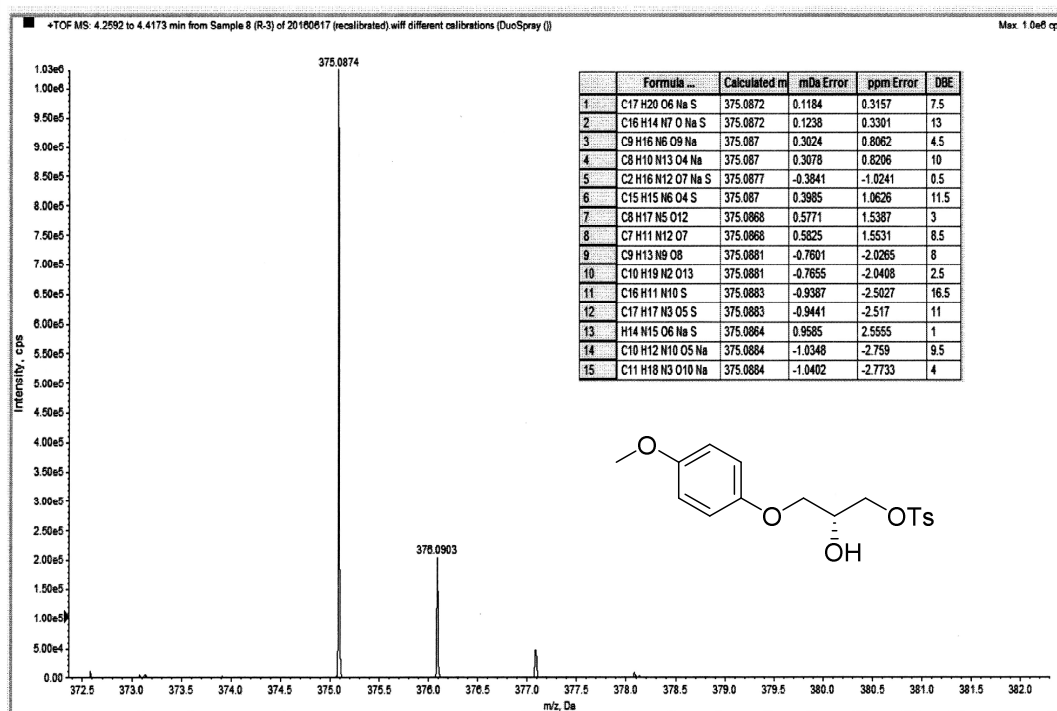

$^1\text{H}$ -NMR for compound (*S*)-4

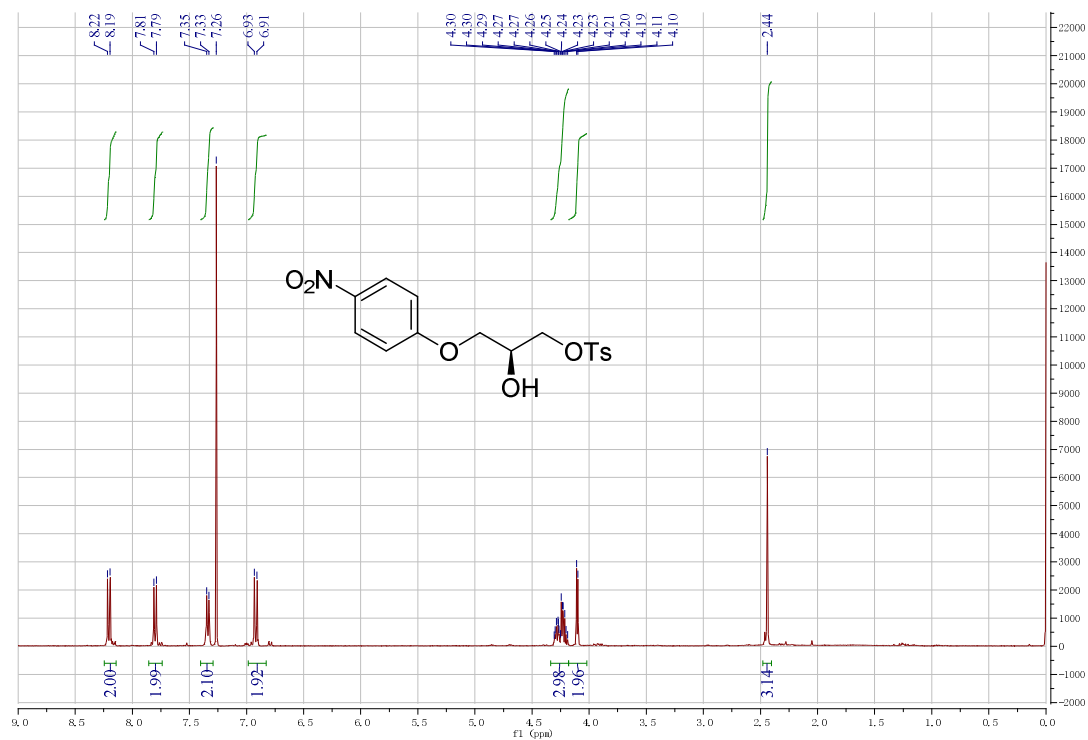

$^{13}\text{C}$ -NMR for compound (*S*)-4

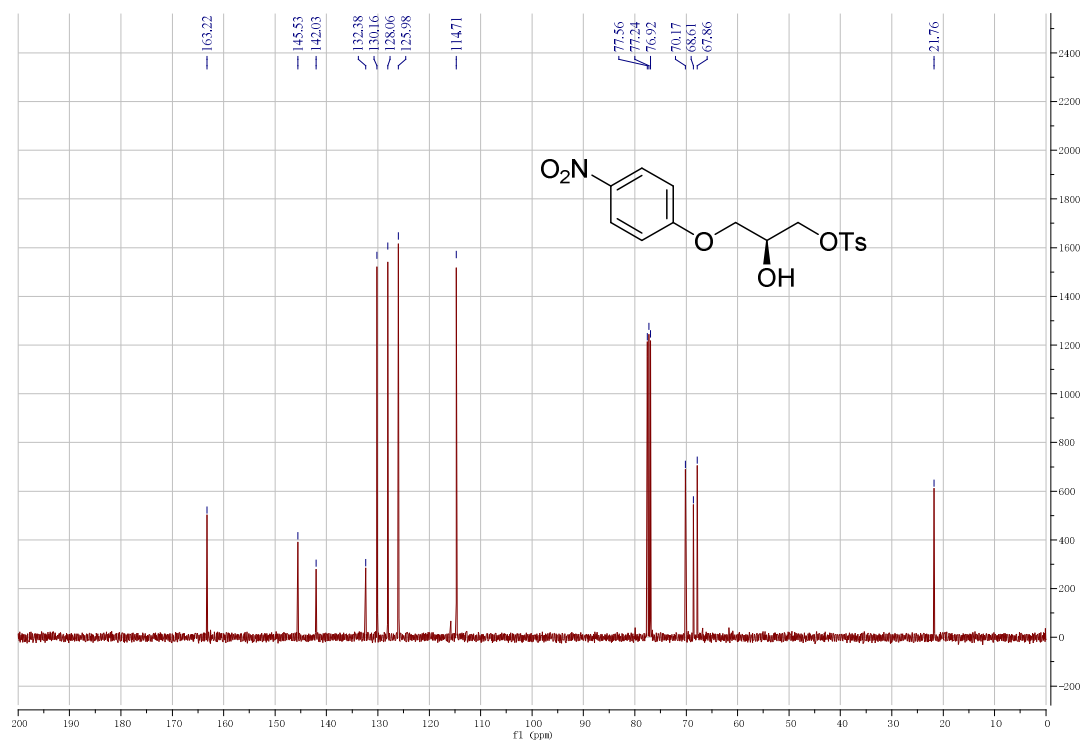

# HRMS for compound (*S*)-4

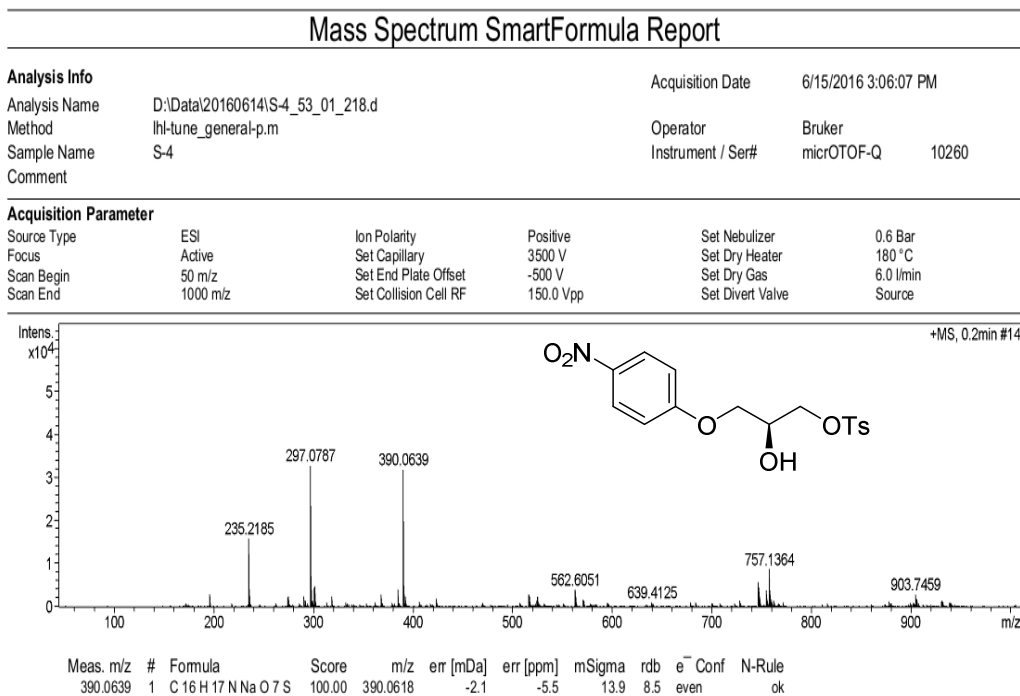

# <sup>1</sup>H-NMR for compound (*R*)-4

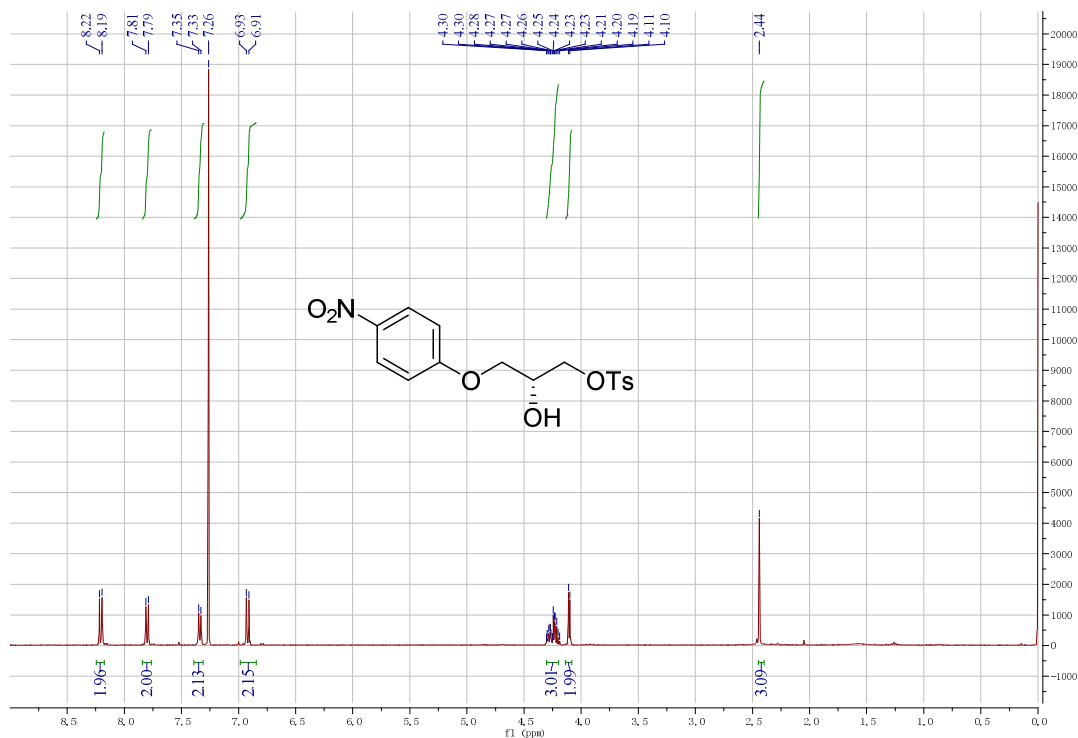



<sup>13</sup>C-NMR for compound (R)-4

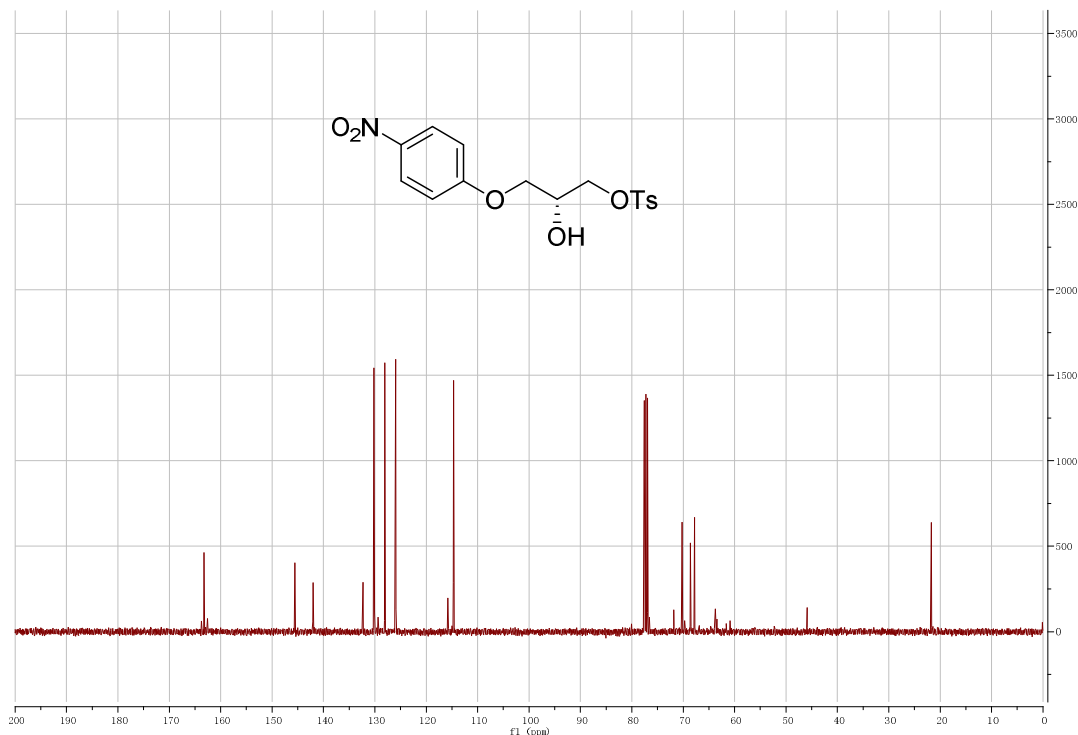

HRMS for compound (R)-4

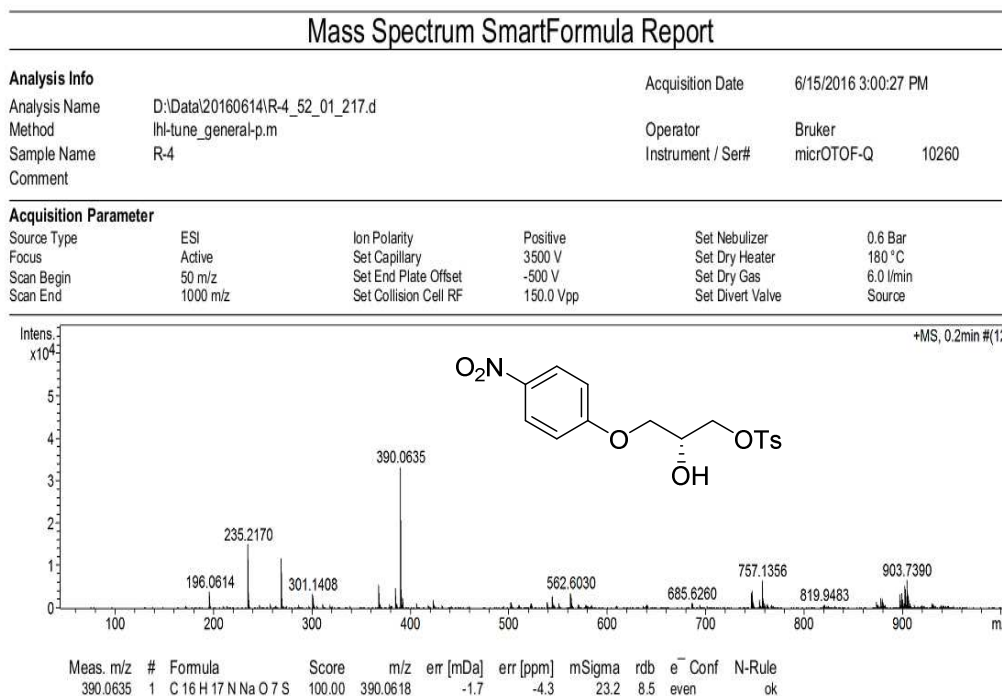

<sup>1</sup>H-NMR for compound (*S*)-5

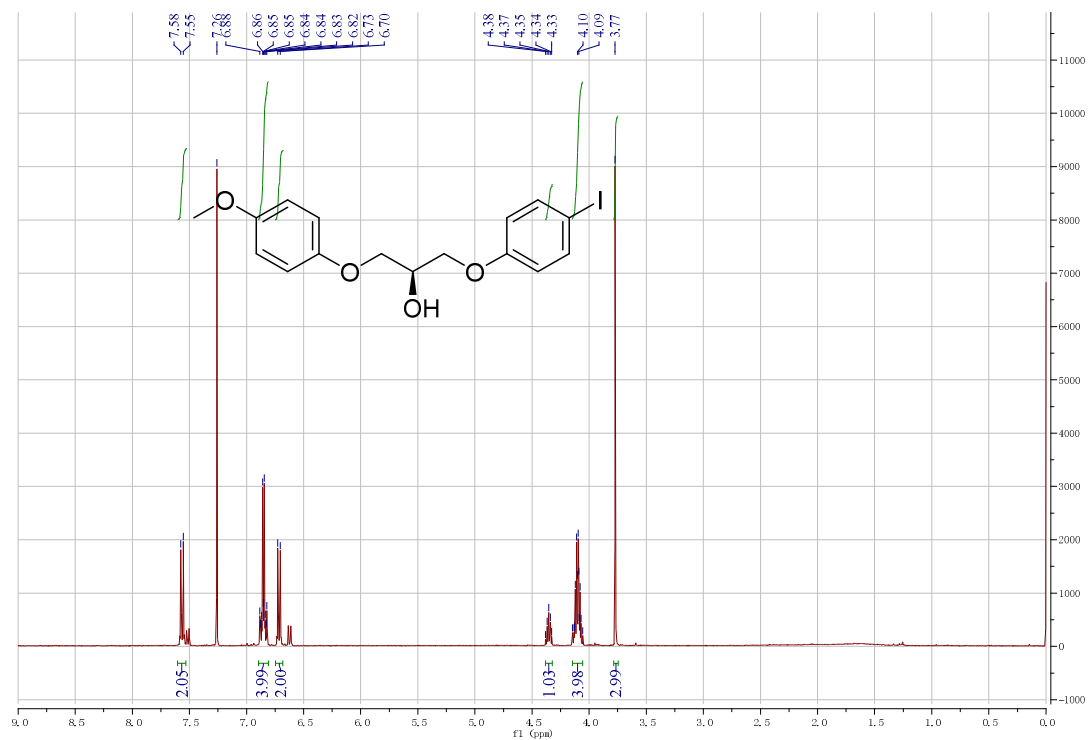

<sup>13</sup>C-NMR for compound (*S*)-5

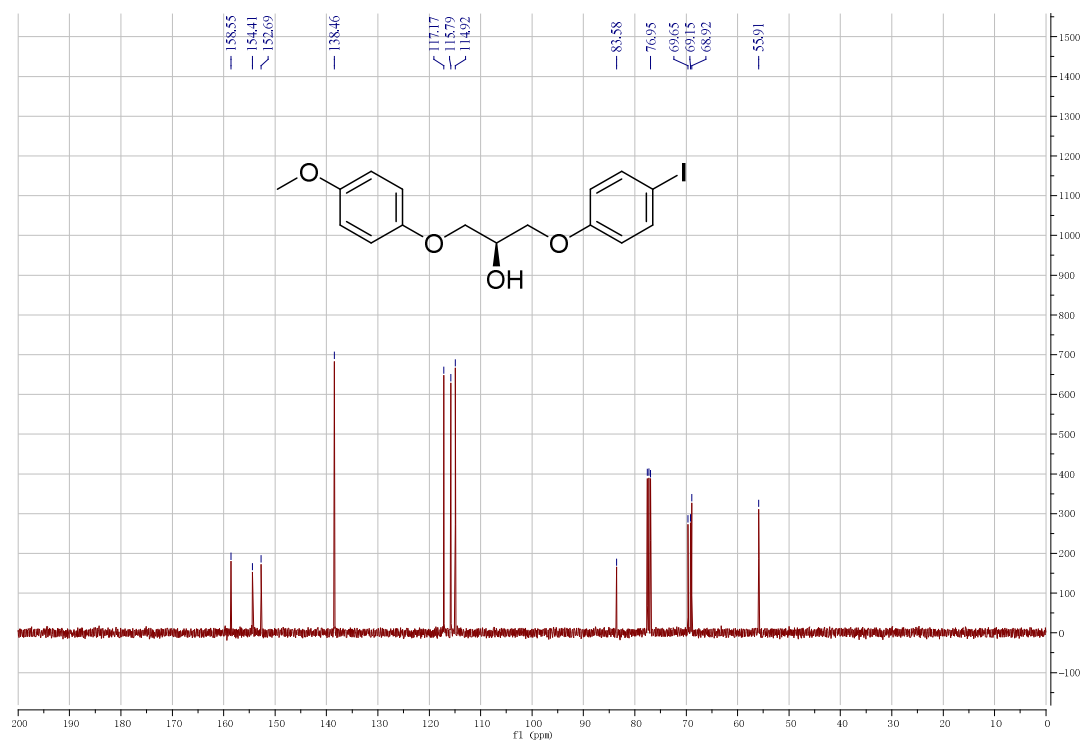

# HRMS for compound (*S*)-5

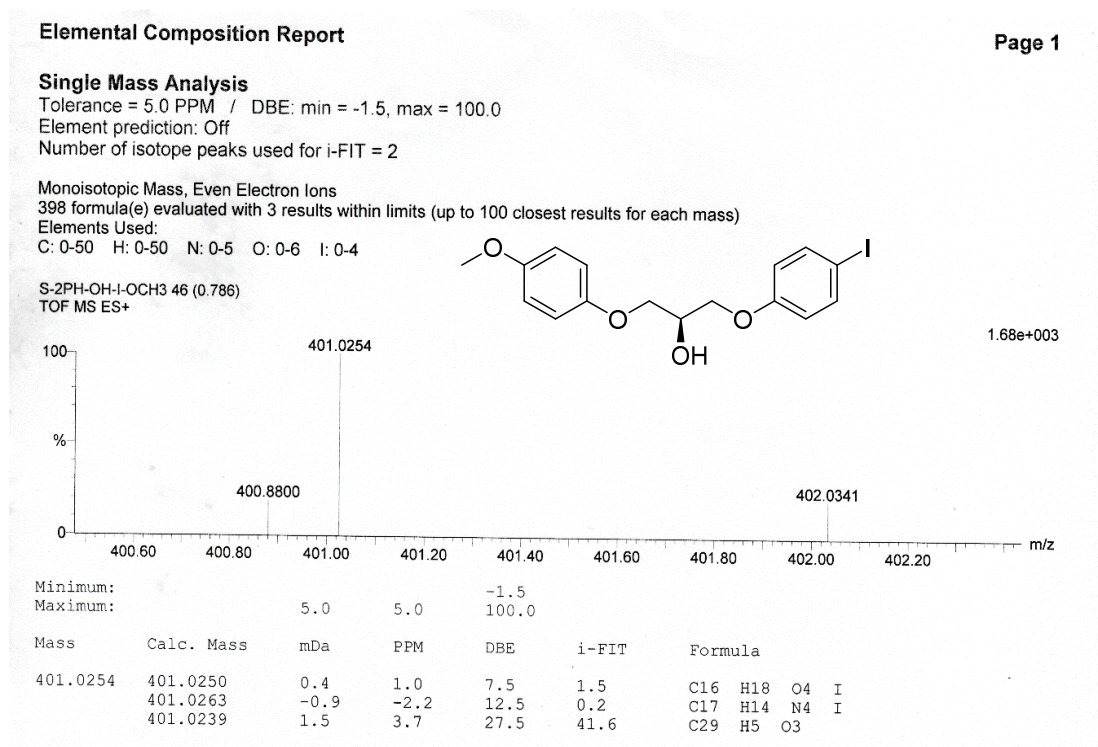

# <sup>1</sup>H-NMR for compound (*R*)-5

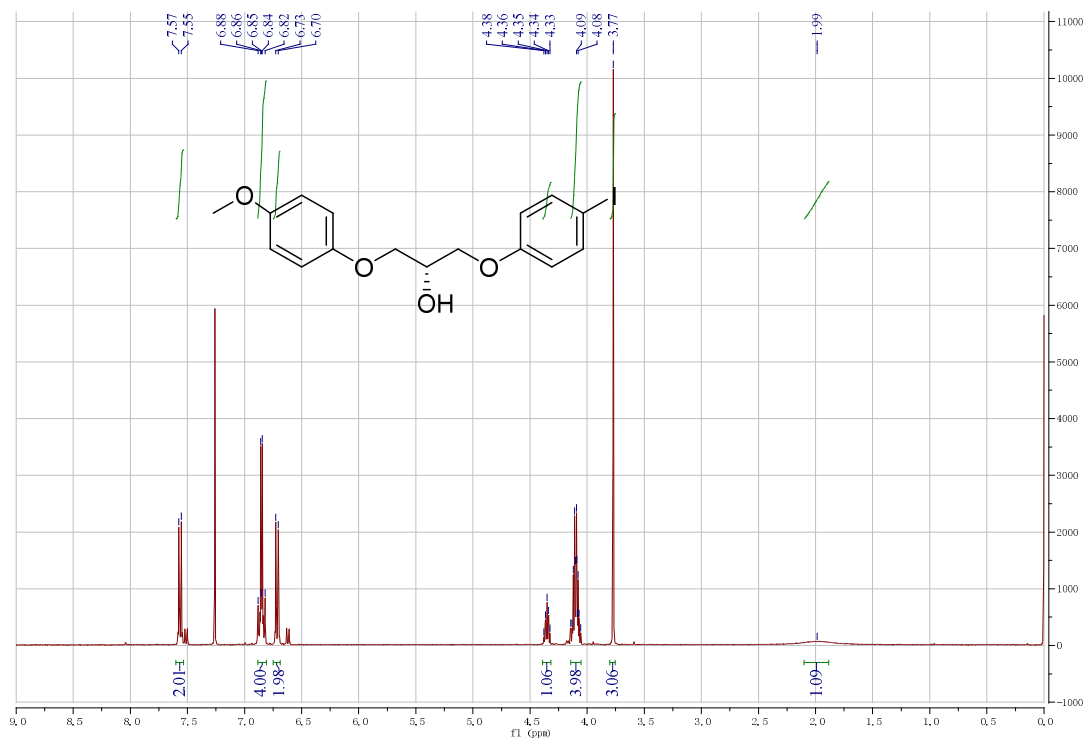

<sup>13</sup>C-NMR for compound (*R*)-5

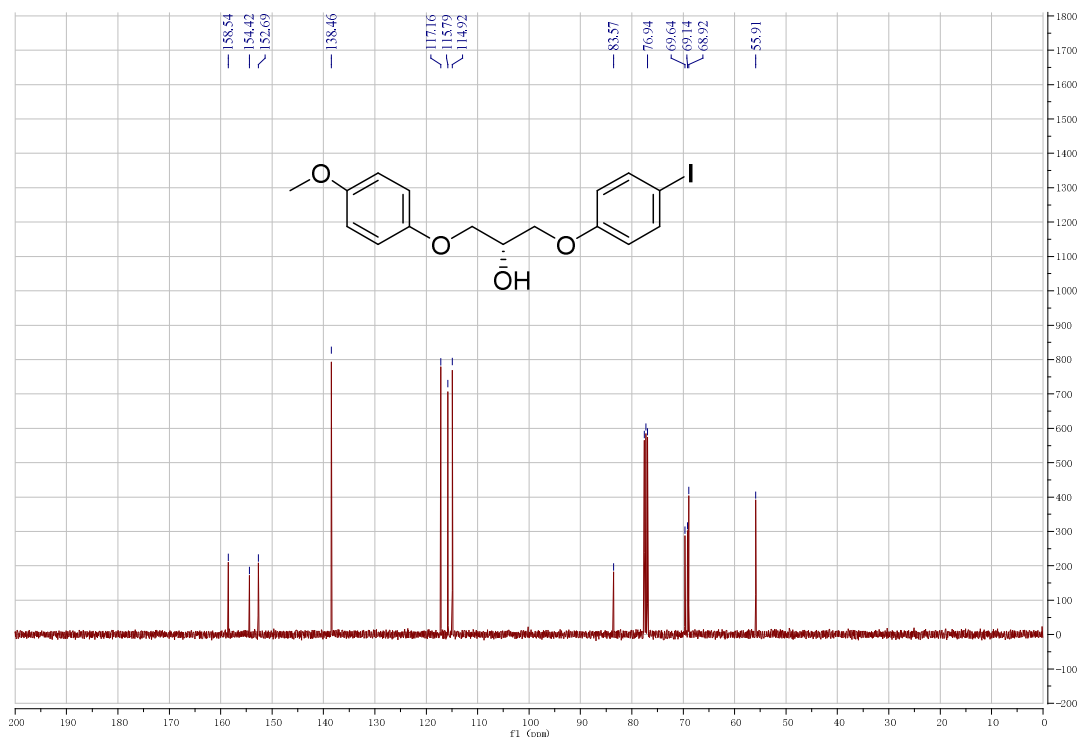

HRMS for compound (*R*)-5

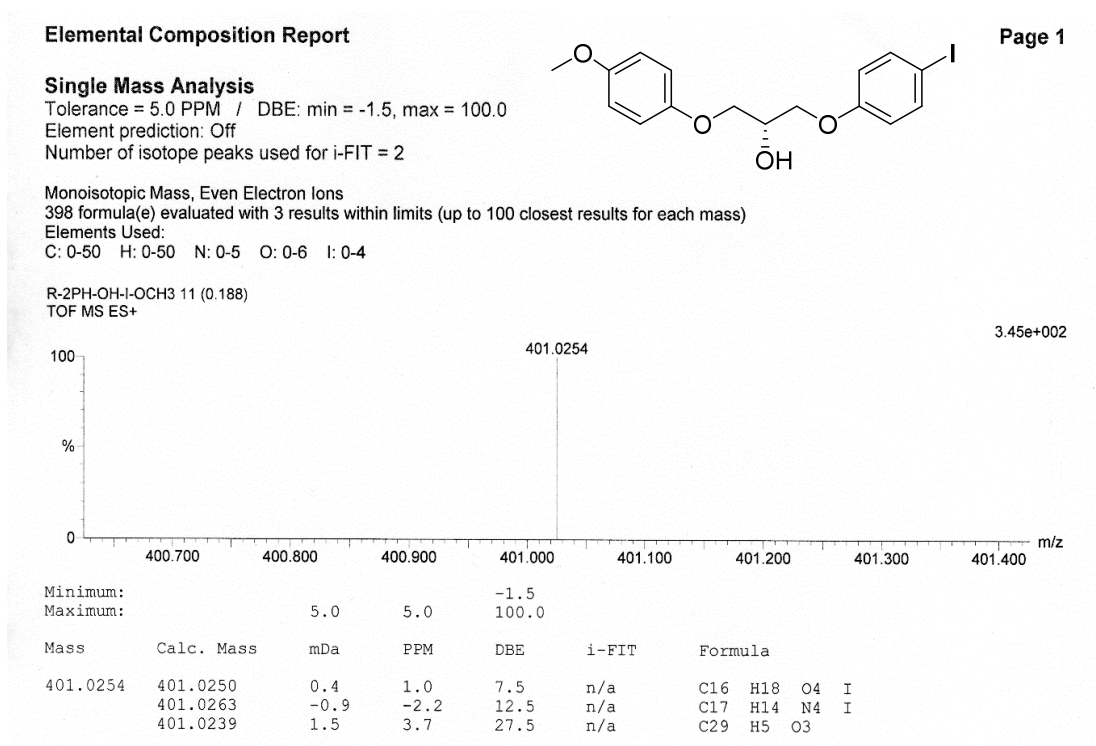

$^1\text{H}$ -NMR for compound (*S*)-6

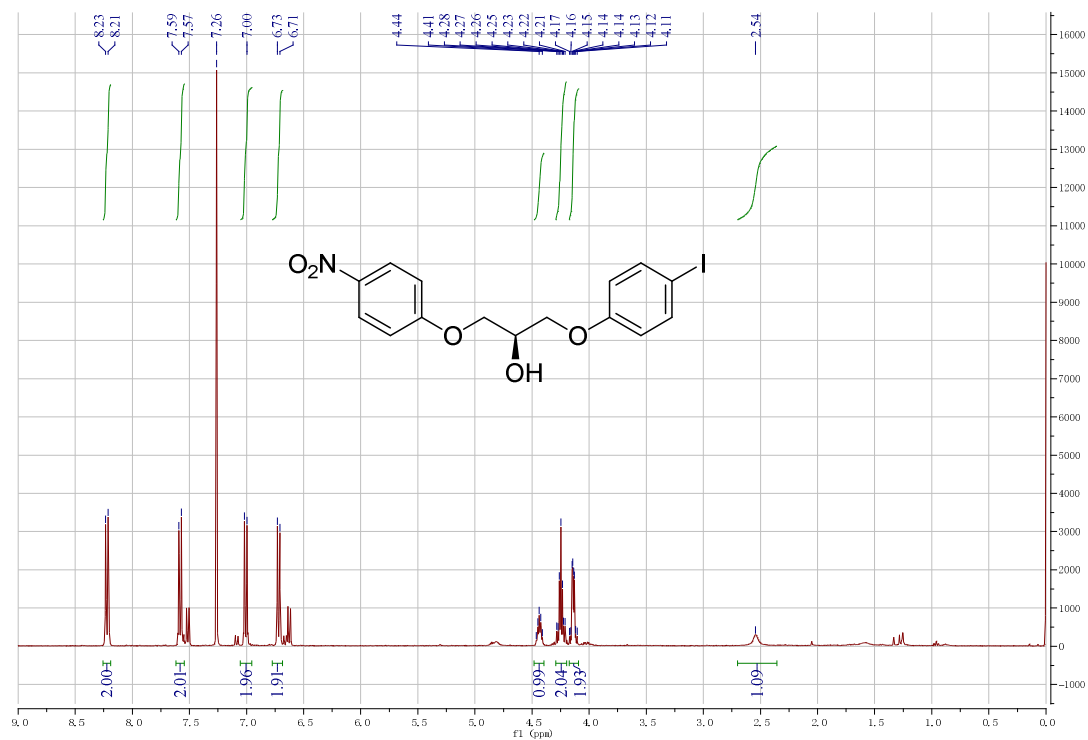

$^{13}\text{C}$ -NMR for compound (*S*)-6

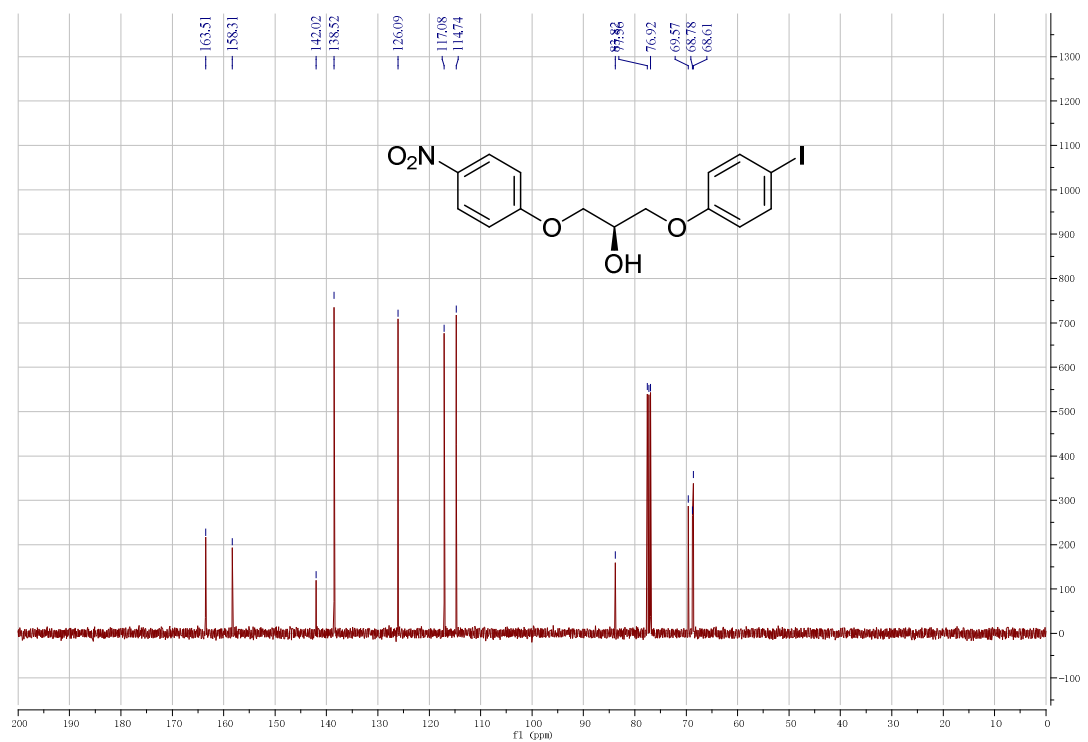

# HRMS for compound (*S*)-6

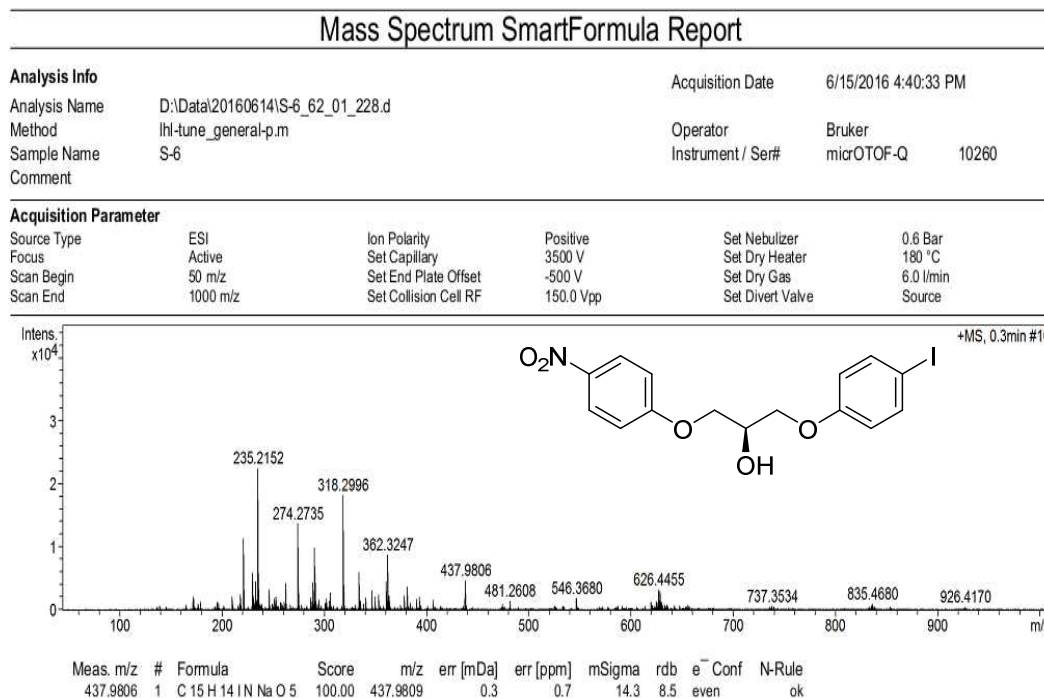

# <sup>1</sup>H-NMR for compound (*R*)-6

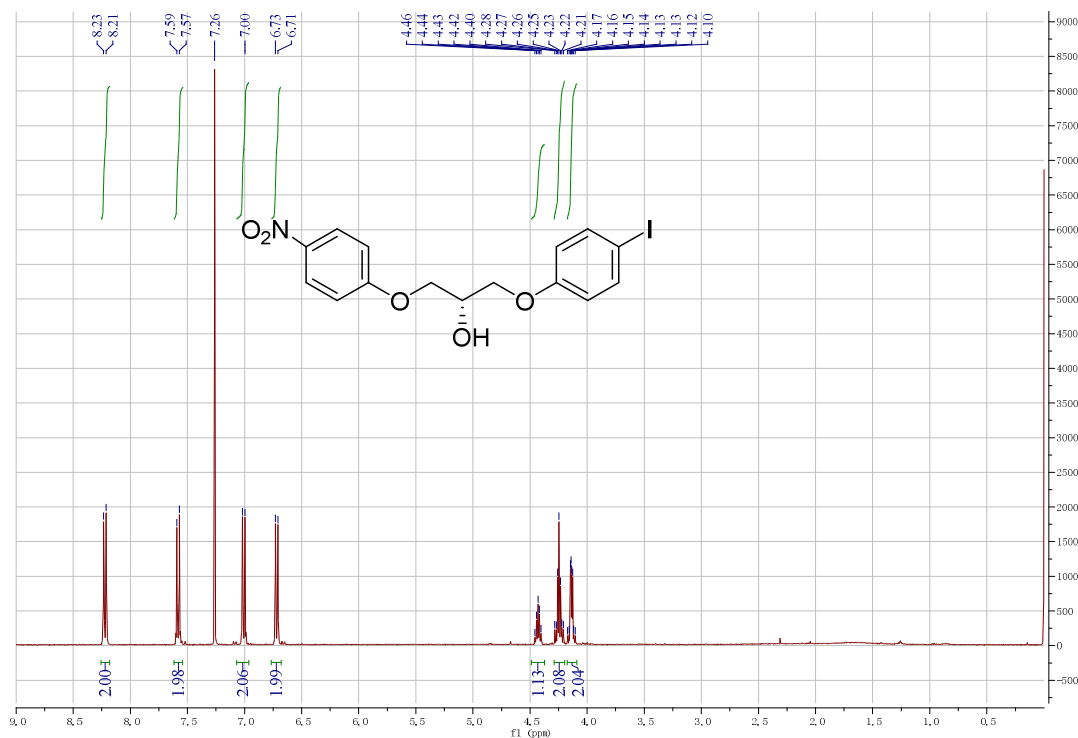

<sup>13</sup>C-NMR for compound (R)-6

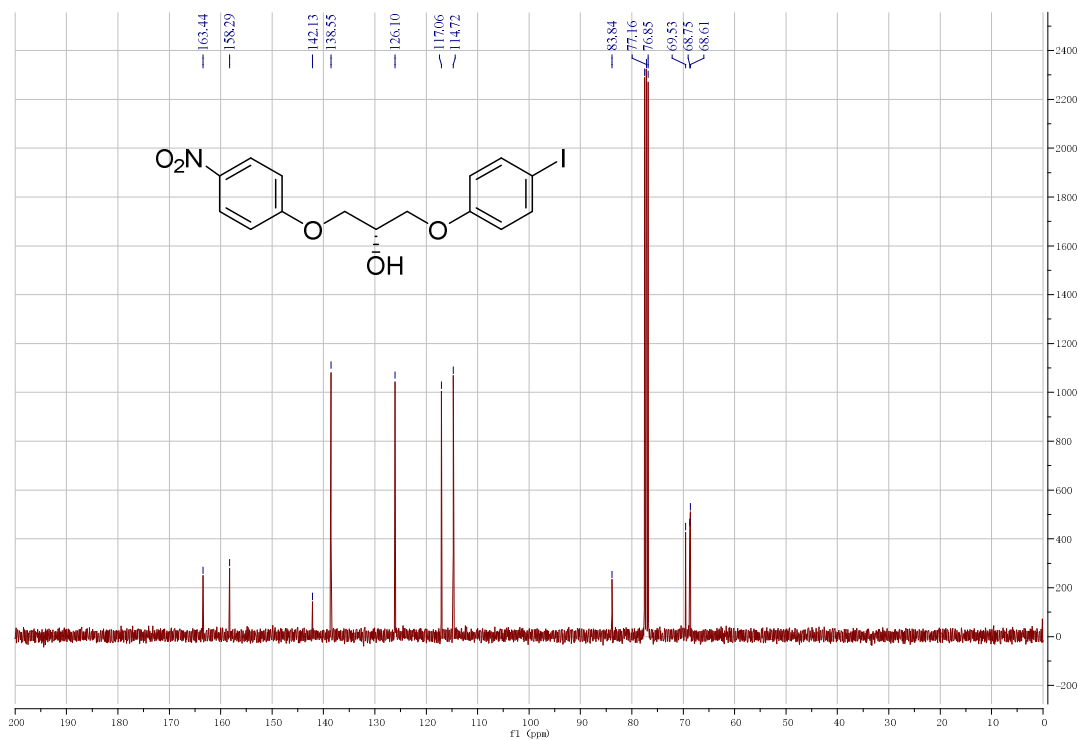

HRMS for compound (R)-6

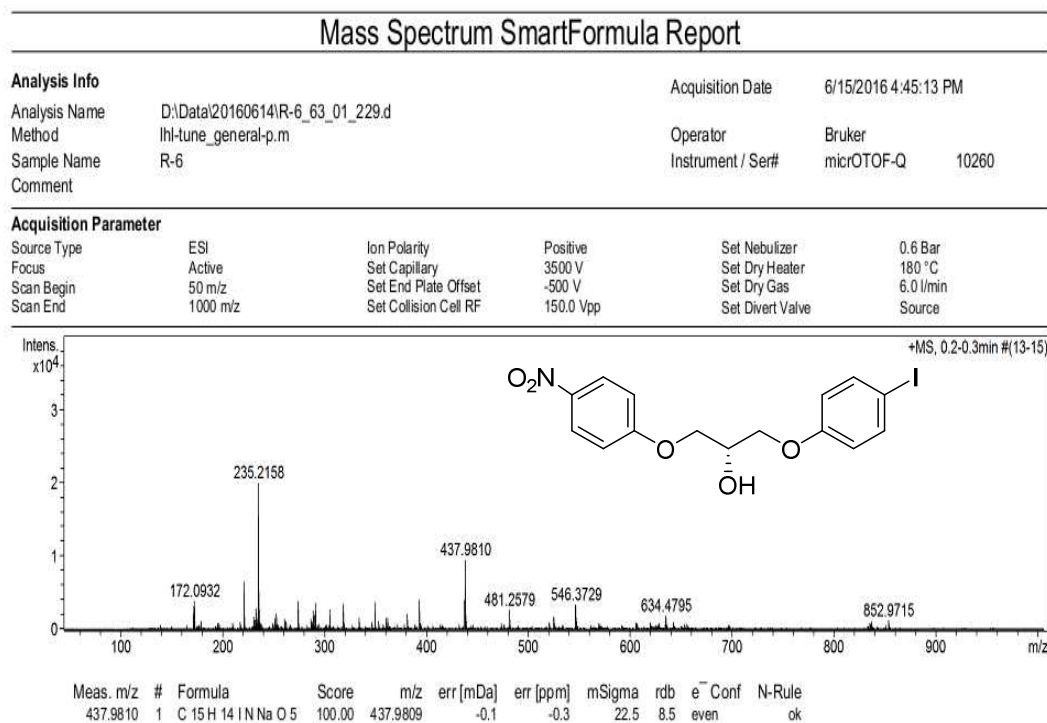

$^1\text{H}$ -NMR for compound (*S*)-7

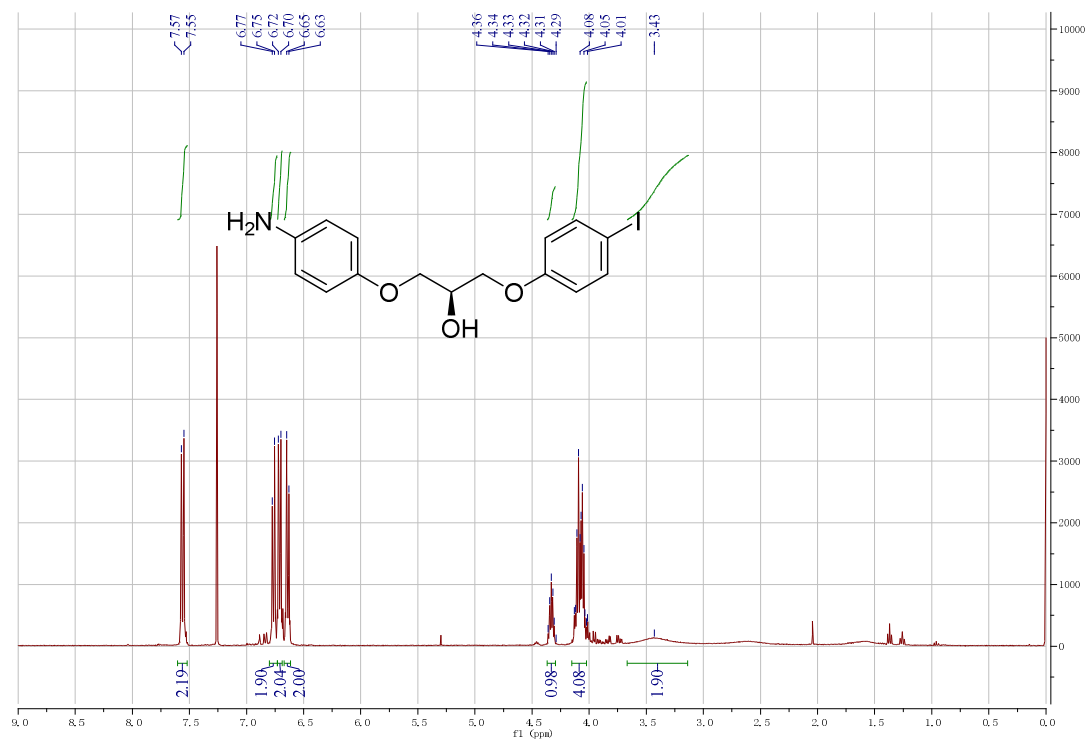

$^{13}\text{C}$ -NMR for compound (*S*)-7

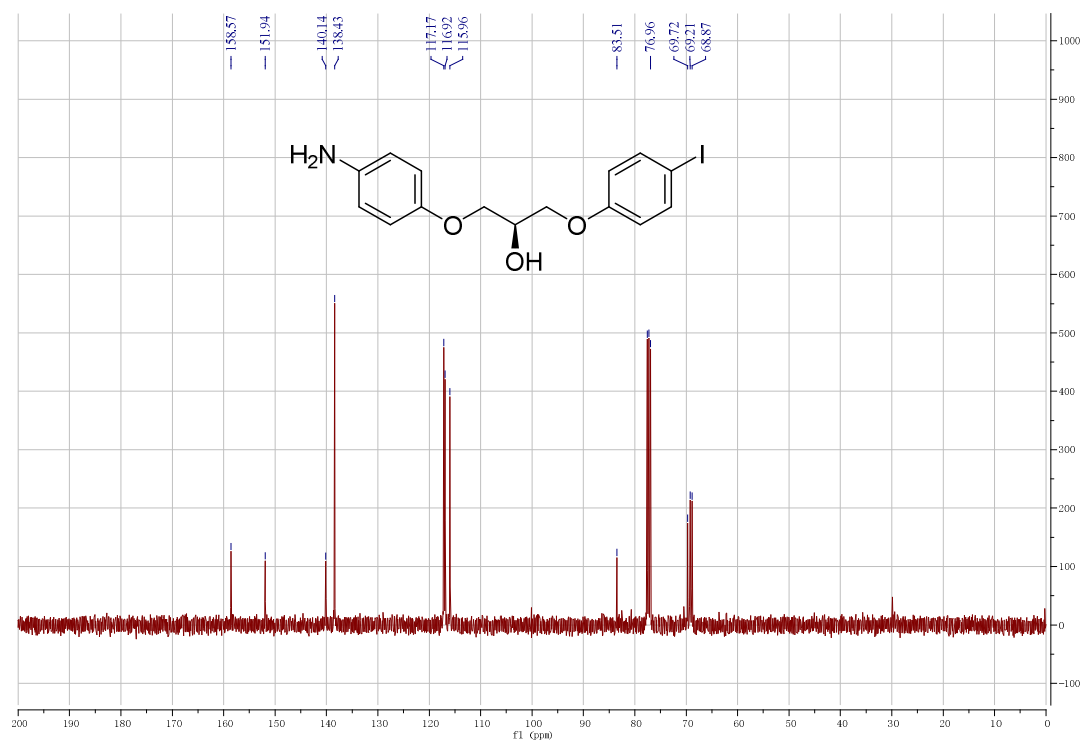



# HRMS for compound (S)-7

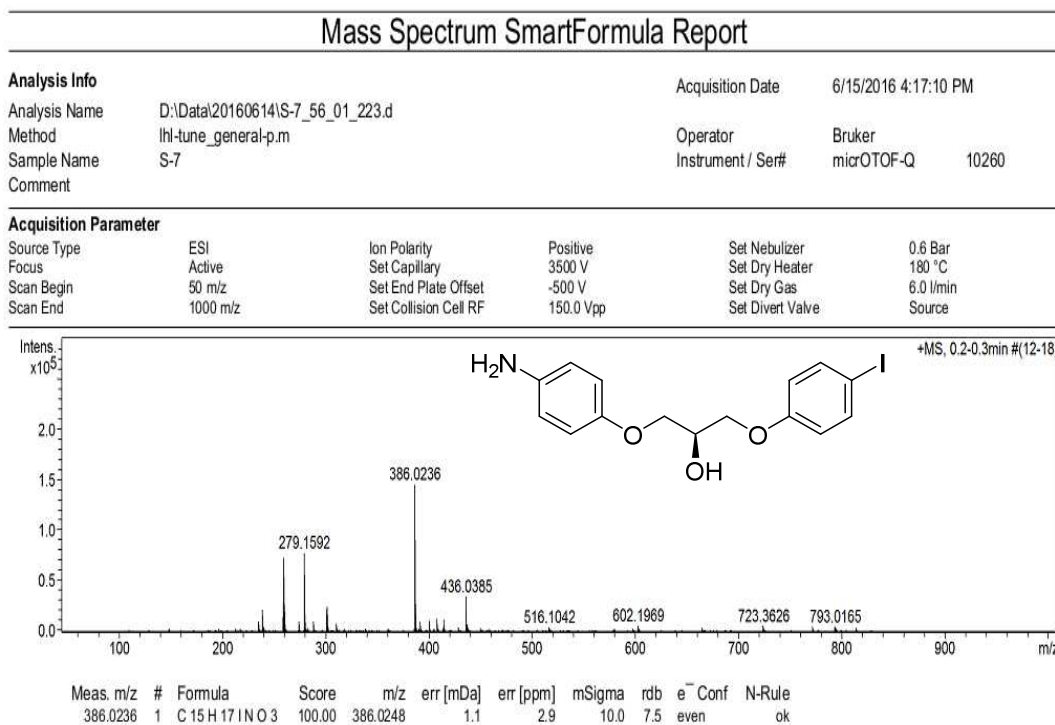

# <sup>1</sup>H-NMR for compound (R)-7

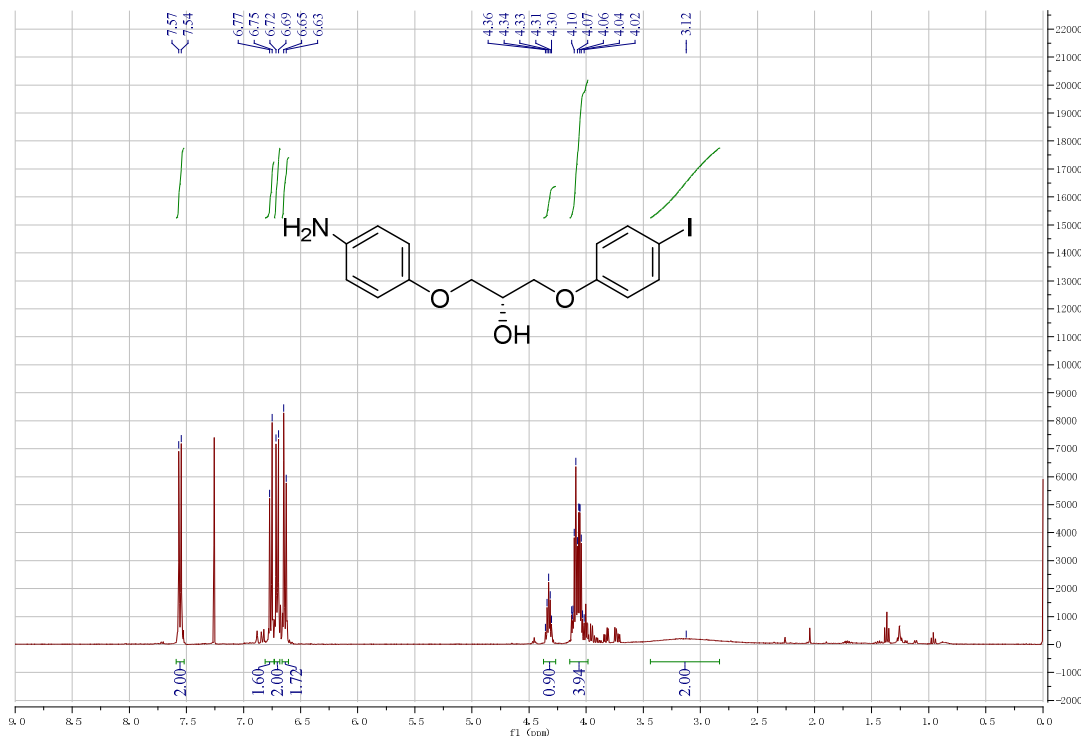

<sup>13</sup>C-NMR for compound (R)-7

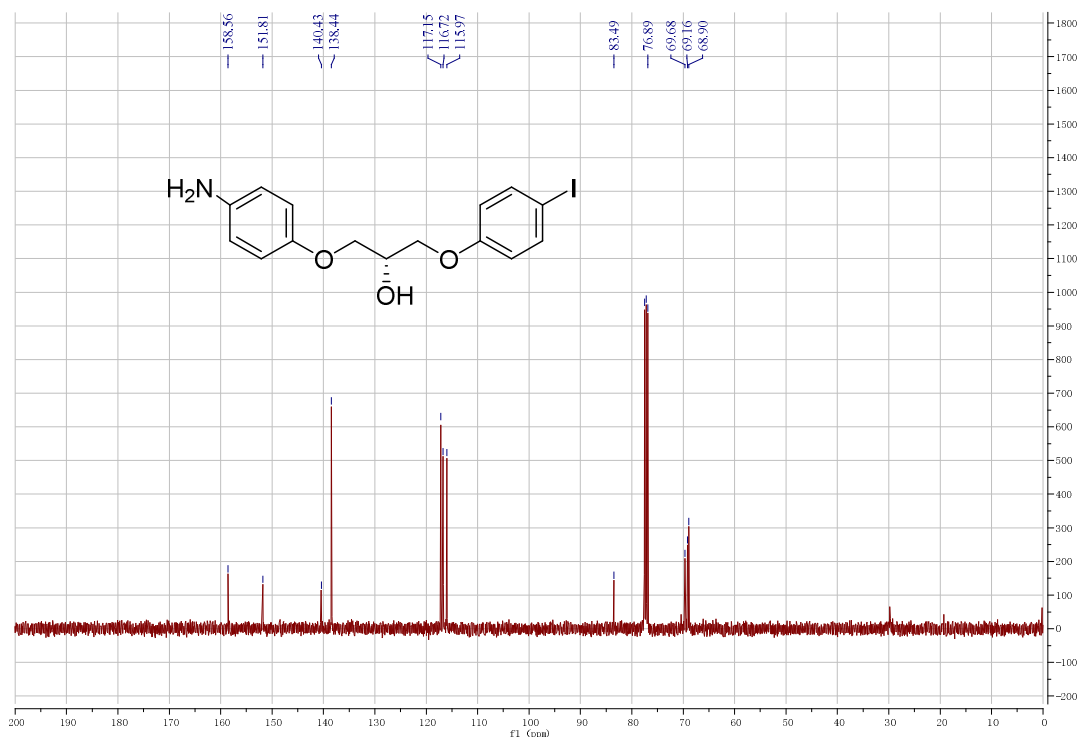

HRMS for compound (R)-7

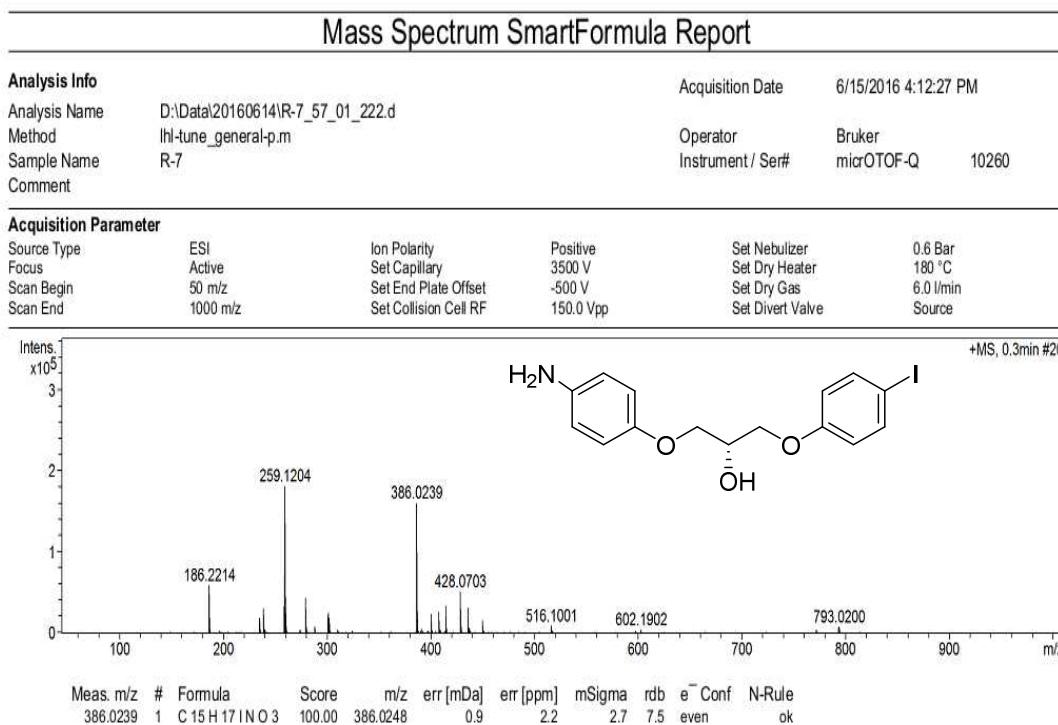

<sup>1</sup>H-NMR for compound (S)-8

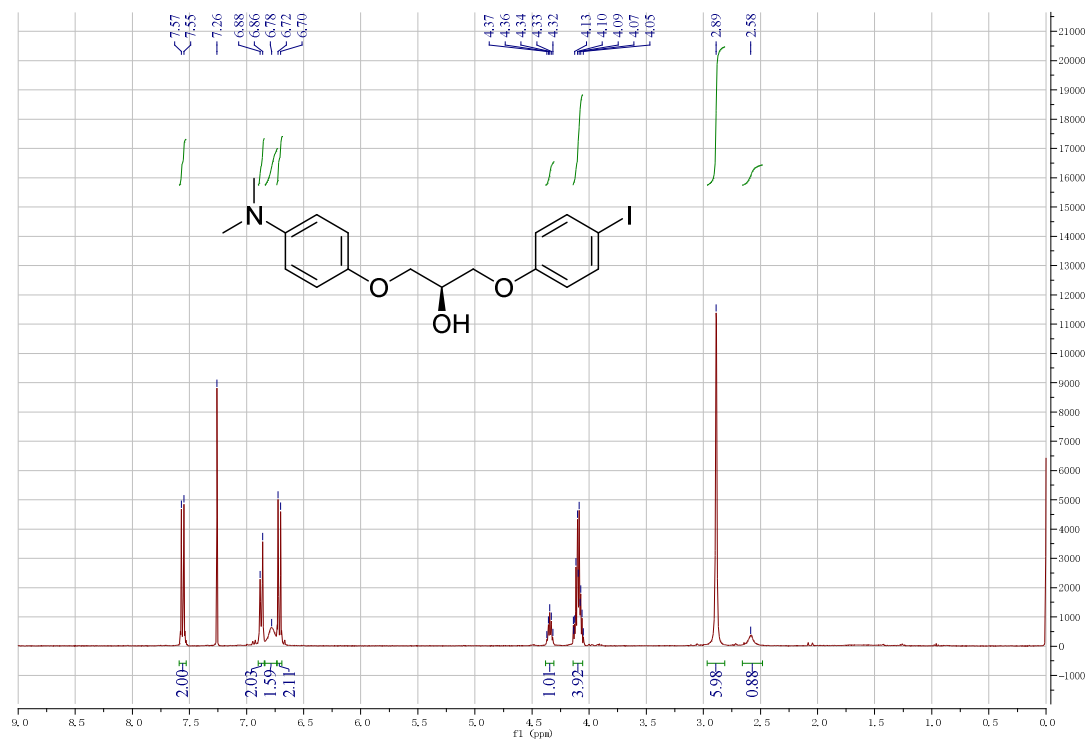

<sup>13</sup>C-NMR for compound (S)-8

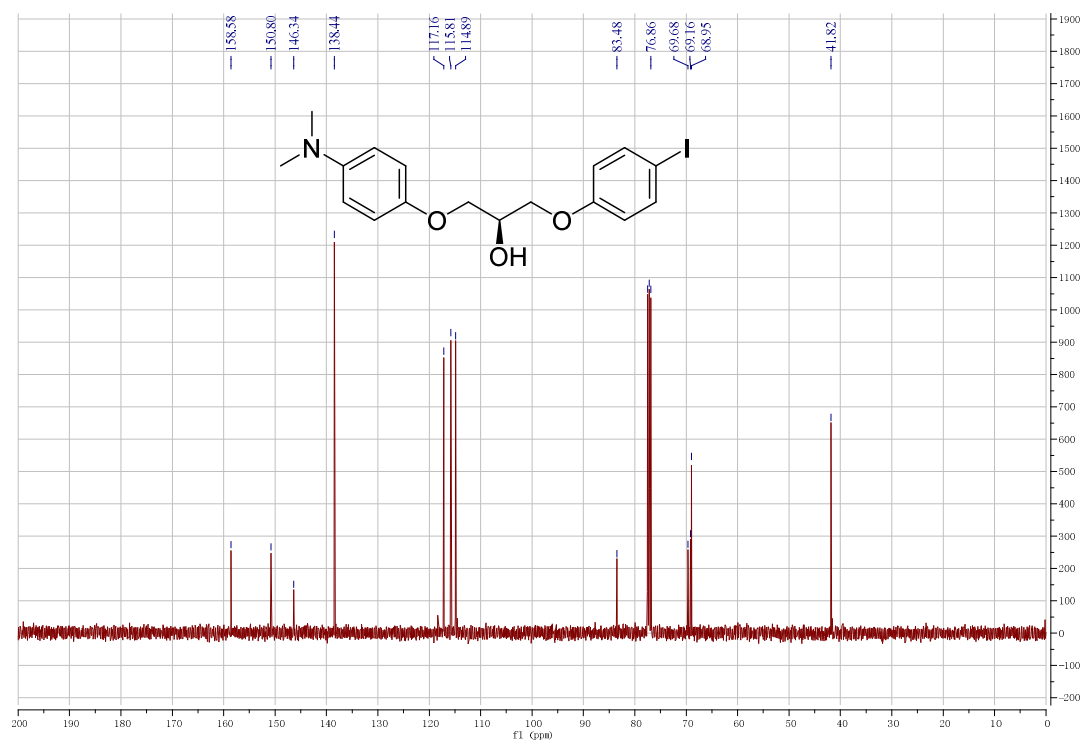

## HRMS for compound (S)-8

### Elemental Composition Report

#### Single Mass Analysis

Tolerance = 3.0 PPM / DBE: min = -1.5, max = 100.0

Element prediction: Off

Number of isotope peaks used for i-FIT = 2

Monoisotopic Mass, Even Electron Ions

612 formula(e) evaluated with 3 results within limits (up to 100 closest results for each mass)

Elements Used:

C: 0-50 H: 0-50 N: 0-5 O: 0-11 I: 0-4

2PH-S-OH-NME2-I 17 (0.290)

TOF MS AP+

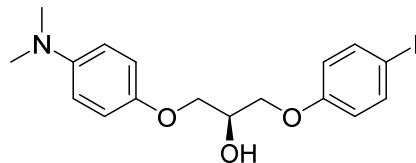

Page 1

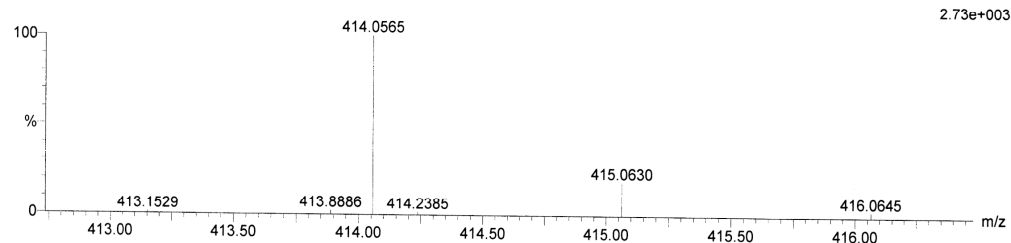

|          |            |      |      |      |       |                  |
|----------|------------|------|------|------|-------|------------------|
| Minimum: |            |      |      |      |       |                  |
| Maximum: |            | 5.0  | 3.0  | -1.5 |       |                  |
| Mass     | Calc. Mass | mDa  | PPM  | DBE  | i-FIT | Formula          |
| 414.0565 | 414.0566   | -0.1 | -0.2 | 7.5  | 0.8   | C17 H21 N O3 I ✓ |
|          | 414.0574   | -0.9 | -2.2 | 14.5 | 5.5   | C18 H12 N3 O9    |
|          | 414.0555   | 1.0  | 2.4  | 27.5 | 106.7 | C30 H8 N O2      |

## <sup>1</sup>H-NMR for compound (R)-8

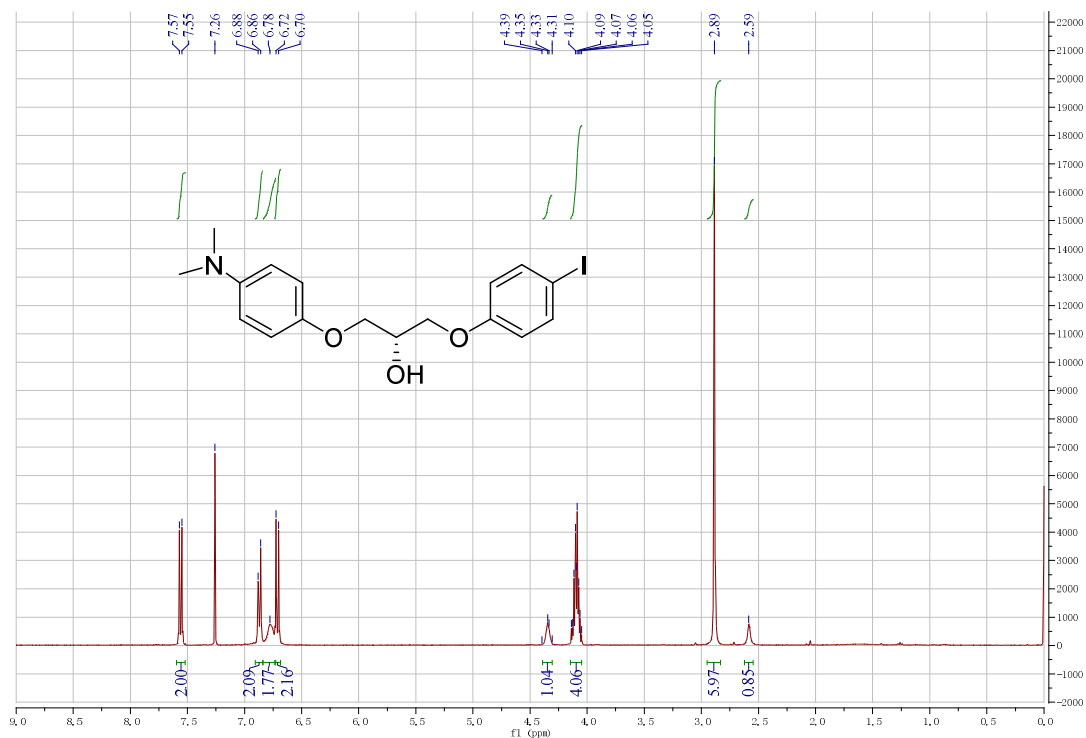

<sup>13</sup>C-NMR for compound (*R*)-8

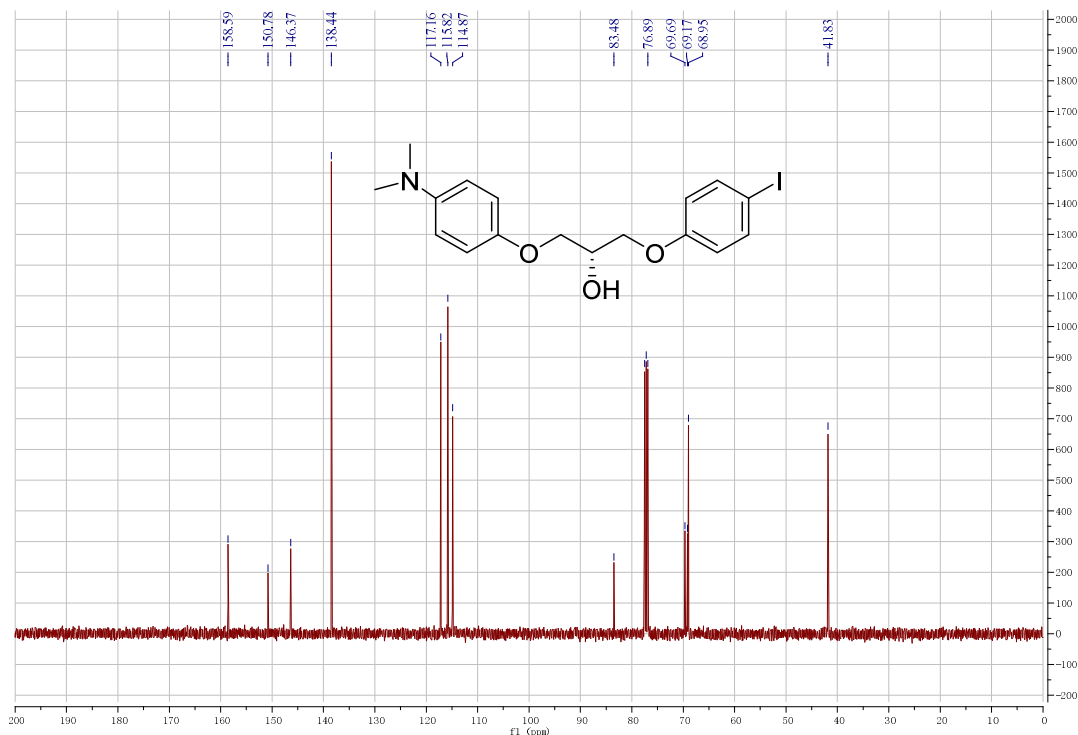

HRMS for compound (*R*)-8

Elemental Composition Report

Single Mass Analysis

Tolerance = 3.0 PPM / DBE: min = -1.5, max = 100.0

Element prediction: Off

Number of isotope peaks used for i-FIT = 2

Monoisotopic Mass, Even Electron Ions

612 formula(e) evaluated with 3 results within limits (up to 100 closest results for each mass)

Elements Used:

C: 0-50 H: 0-50 N: 0-5 O: 0-11 I: 0-4

2PH-R-OH-NME2-I 30 (0.513)

TOF MS AP+

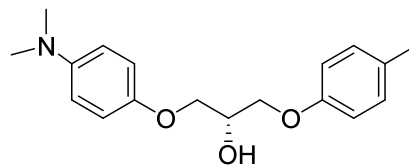

Page 1

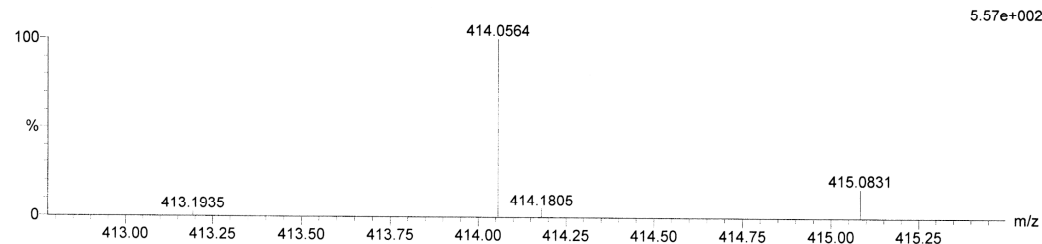

Minimum: -1.5  
Maximum: 5.0 3.0 100.0

| Mass     | Calc. Mass | mDa  | PPM  | DBE  | i-FIT | Formula          |
|----------|------------|------|------|------|-------|------------------|
| 414.0564 | 414.0566   | -0.2 | -0.5 | 7.5  | 2.7   | C17 H21 N O3 I ✓ |
|          | 414.0555   | 0.9  | 2.2  | 27.5 | n/a   | C30 H8 N O2      |
|          | 414.0574   | -1.0 | -2.4 | 14.5 | n/a   | C18 H12 N3 O9    |

<sup>1</sup>H-NMR for compound (*S*)-**9**

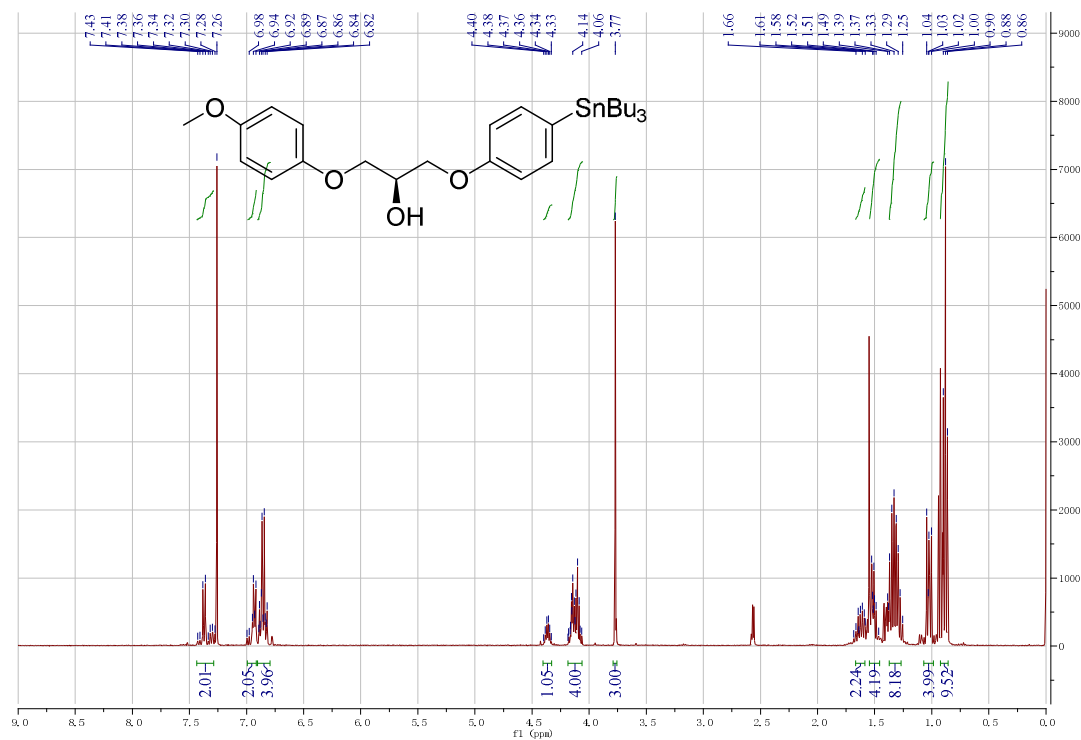

<sup>13</sup>C-NMR for compound (*S*)-**9**

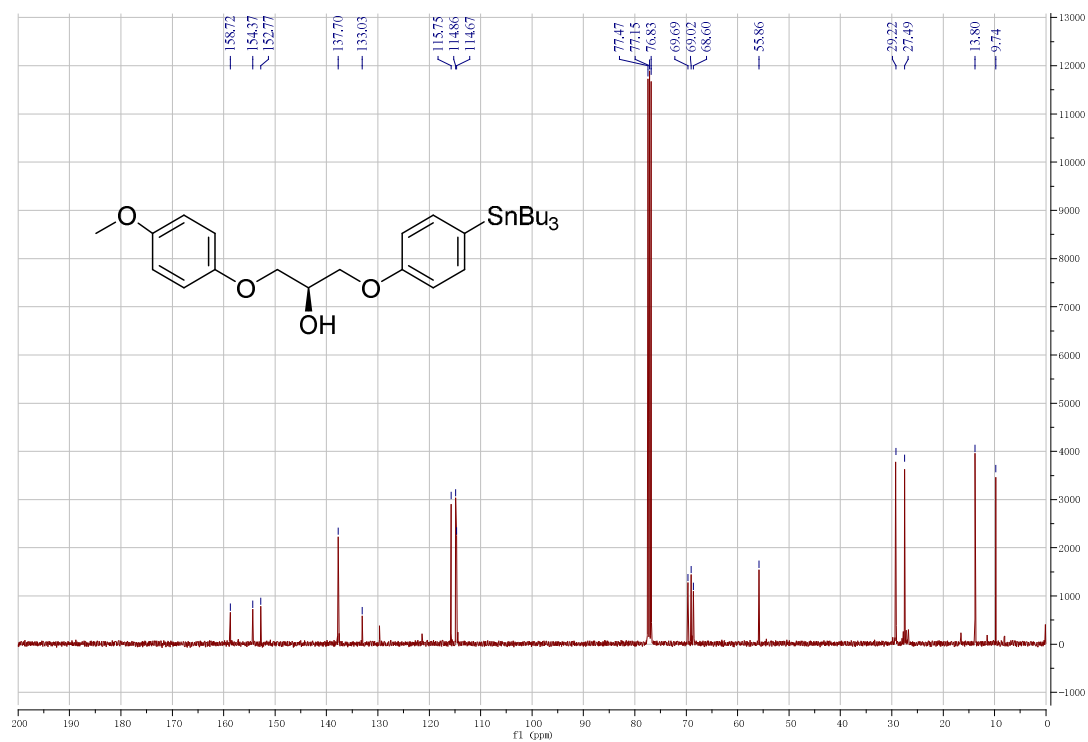

# HRMS for compound (S)-9

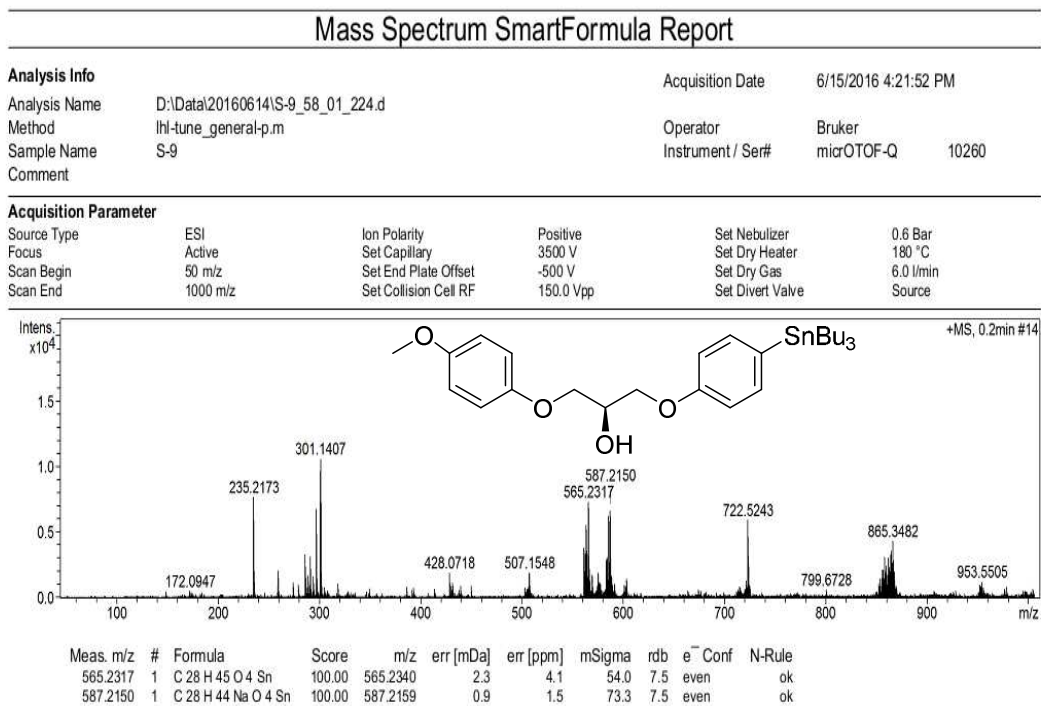

# <sup>1</sup>H-NMR for compound (R)-9

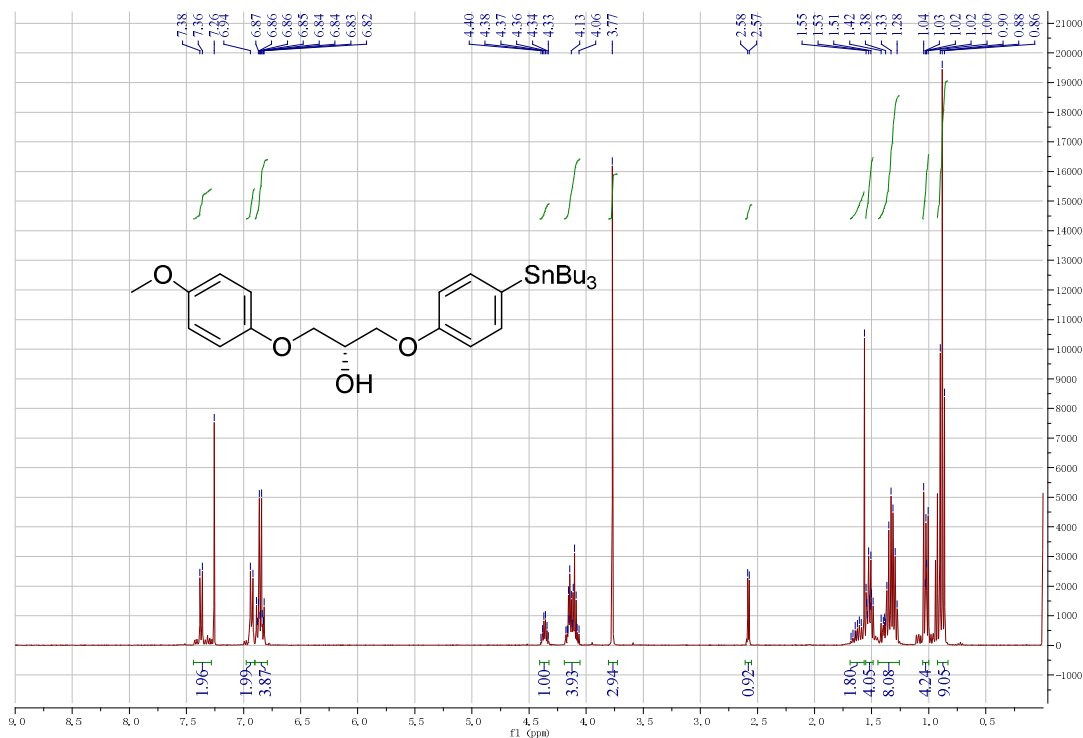

<sup>13</sup>C-NMR for compound (R)-9

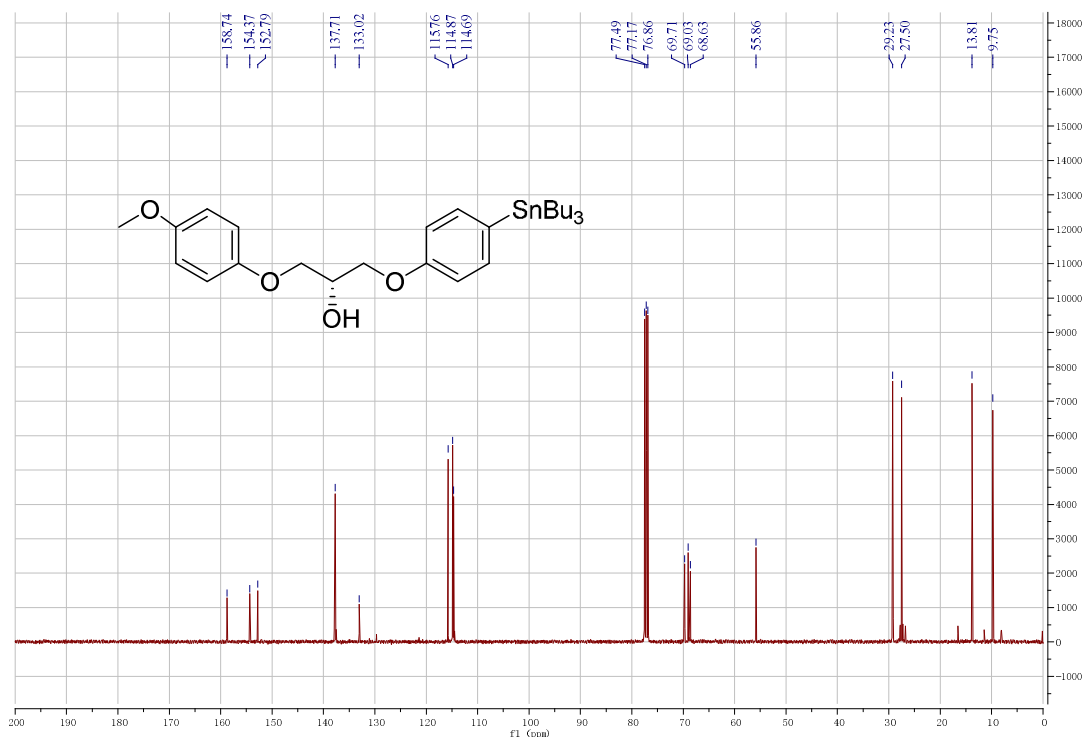

HRMS for compound (R)-9

Mass Spectrum SmartFormula Report

Analysis Info

Analysis Name: D:\Data\20160614\R-9\_01\_225.d  
 Method: lhl-tune\_general-p.m  
 Sample Name: R-9  
 Comment:

Acquisition Date: 6/15/2016 4:26:34 PM

Operator: Bruker  
 Instrument / Ser#: microTOF-Q 10260

Acquisition Parameter

| Source Type | ESI      | Ion Polarity          | Positive  | Set Nebulizer    | 0.6 Bar   |
|-------------|----------|-----------------------|-----------|------------------|-----------|
| Focus       | Active   | Set Capillary         | 3500 V    | Set Dry Heater   | 180 °C    |
| Scan Begin  | 50 m/z   | Set End Plate Offset  | -500 V    | Set Dry Gas      | 6.0 l/min |
| Scan End    | 1000 m/z | Set Collision Cell RF | 150.0 Vpp | Set Divert Valve | Source    |

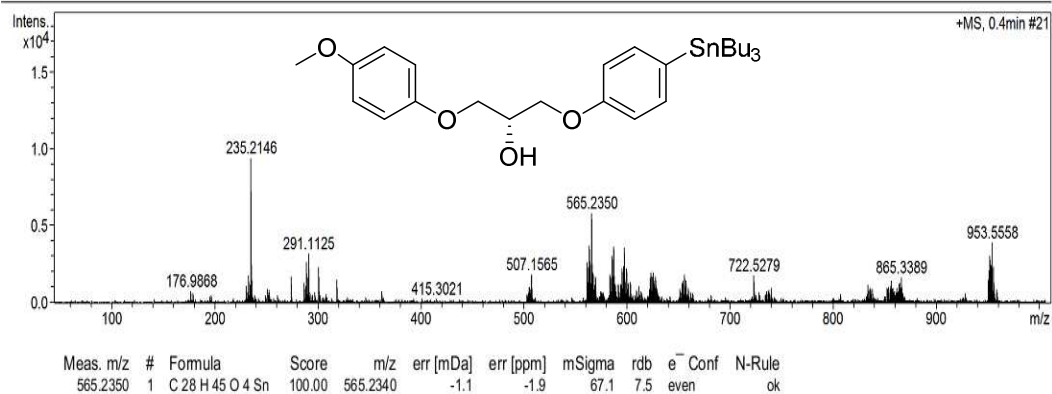

Supplement: Supplementary file 1 [file 5489864]
